# Supplementary material for: Structural and regulatory insights into the glideosome-associated connector from Toxoplasma gondii
Source: eLife journal article supplement (doi:10.7554/elife.86049), 2023-04-04
Supplement: fig2-data1 [file GAC_SAXS_RawData.xlsx]

## Sheet: Sheet1
	GAC, 1.3 mg/mL
	pH 4.0				pH 4.5				pH 5.0				pH 6.0				pH 6.5				pH 7.0				pH 7.5				pH 8.0
	q	I(q)	Error (I(q))		q	I(q)	Error (I(q))		q	I(q)	Error (I(q))		q	I(q)	Error (I(q))		q	I(q)	Error (I(q))		q	I(q)	Error (I(q))		q	I(q)	Error (I(q))		q	I(q)	Error (I(q))
	0.00981	0.53401	0.00548		0.00981	0.9893	0.00827		0.00981	1.47562	0.01128		0.00981	0.20996	0.00348		0.00981	0.18258	0.00331		0.00981	0.17968	0.00334		0.00981	0.1741	0.0033		0.00981	0.16217	0.00323
	0.01063	0.49059	0.00517		0.01063	0.89339	0.00808		0.01063	1.33543	0.01131		0.01063	0.2066	0.00311		0.01063	0.17608	0.00289		0.01063	0.1679	0.00287		0.01063	0.17181	0.00289		0.01063	0.15123	0.00275
	0.01145	0.43153	0.00466		0.01145	0.77305	0.00731		0.01145	1.16739	0.01041		0.01145	0.1895	0.00278		0.01145	0.1639	0.00258		0.01145	0.15982	0.00258		0.01145	0.15659	0.00255		0.01145	0.1394	0.00242
	0.01227	0.38008	0.00409		0.01227	0.65979	0.00628		0.01227	1.00597	0.00902		0.01227	0.17654	0.00249		0.01227	0.15544	0.00232		0.01227	0.14891	0.00229		0.01227	0.14676	0.00228		0.01227	0.13237	0.00217
	0.01308	0.31626	0.00338		0.01308	0.52872	0.00502		0.01308	0.80804	0.00719		0.01308	0.15705	0.00215		0.01308	0.13679	0.002		0.01308	0.136	0.00201		0.01308	0.13126	0.00198		0.01308	0.11975	0.00189
	0.0139	0.26778	0.00142		0.0139	0.42754	0.00168		0.0139	0.66172	0.00201		0.0139	0.14385	0.00116		0.0139	0.12701	0.00112		0.0139	0.12459	0.00113		0.0139	0.12156	0.00112		0.0139	0.11137	0.0011
	0.01472	0.22853	0.00129		0.01472	0.34844	0.00149		0.01472	0.54187	0.00178		0.01472	0.13128	0.00107		0.01472	0.11817	0.00104		0.01472	0.11472	0.00105		0.01472	0.11257	0.00104		0.01472	0.10351	0.00102
	0.01554	0.19376	0.00116		0.01554	0.28841	0.00133		0.01554	0.44887	0.00159		0.01554	0.11925	0.000996416		0.01554	0.10788	0.000966549		0.01554	0.10759	0.000980474		0.01554	0.10561	0.000974396		0.01554	0.0951	0.000949727
	0.01636	0.17114	0.00108		0.01636	0.24166	0.00121		0.01636	0.37675	0.00143		0.01636	0.1106	0.000936903		0.01636	0.10142	0.000912248		0.01636	0.10089	0.000924735		0.01636	0.09951	0.000920185		0.01636	0.08874	0.000894601
	0.01717	0.14828	0.00099116		0.01717	0.20193	0.00109		0.01717	0.31797	0.0013		0.01717	0.10304	0.000883001		0.01717	0.09449	0.000859785		0.01717	0.09304	0.000869216		0.01717	0.09079	0.000862501		0.01717	0.08338	0.000844997
	0.01799	0.13263	0.000927563		0.01799	0.17269	0.001		0.01799	0.27348	0.00119		0.01799	0.0967	0.000839817		0.01799	0.08879	0.000818238		0.01799	0.08876	0.000830568		0.01799	0.08812	0.000827918		0.01799	0.07953	0.000807451
	0.01881	0.11463	0.000860448		0.01881	0.14463	0.000919365		0.01881	0.23145	0.00109		0.01881	0.08741	0.000791529		0.01881	0.0817	0.000775286		0.01881	0.08123	0.000785963		0.01881	0.0806	0.00078338		0.01881	0.07319	0.000765621
	0.01963	0.10358	0.00080933		0.01963	0.12484	0.000850819		0.01963	0.20069	0.001		0.01963	0.08305	0.000755859		0.01963	0.07831	0.000742058		0.01963	0.07897	0.000755038		0.01963	0.07583	0.000746213		0.01963	0.07084	0.000734514
	0.02044	0.09418	0.000768332		0.02044	0.11037	0.00079932		0.02044	0.17709	0.000936276		0.02044	0.07857	0.000726544		0.02044	0.07456	0.000714664		0.02044	0.07525	0.000727356		0.02044	0.07333	0.000721647		0.02044	0.0677	0.000708393
	0.02126	0.08332	0.000722611		0.02126	0.09512	0.00074462		0.02126	0.15386	0.000869299		0.02126	0.07288	0.000692982		0.02126	0.07022	0.000684507		0.02126	0.07063	0.00069609		0.02126	0.07024	0.000694235		0.02126	0.06425	0.000680008
	0.02208	0.07387	0.000680919		0.02208	0.08303	0.000697528		0.02208	0.13407	0.000809277		0.02208	0.06939	0.000665805		0.02208	0.06709	0.000658294		0.02208	0.0666	0.000667231		0.02208	0.06553	0.000663686		0.02208	0.06046	0.000651668
	0.0229	0.0672	0.000648307		0.0229	0.07363	0.00065886		0.0229	0.11888	0.000760277		0.0229	0.06434	0.000637242		0.0229	0.06259	0.000631156		0.0229	0.06363	0.000643585		0.0229	0.0629	0.000640944		0.0229	0.05653	0.000625554
	0.02372	0.06148	0.000622133		0.02372	0.06518	0.000626256		0.02372	0.107	0.000721554		0.02372	0.06045	0.000615703		0.02372	0.05969	0.000612143		0.02372	0.06056	0.00062391		0.02372	0.06035	0.000622613		0.02372	0.05533	0.000610752
	0.02453	0.0552	0.000590974		0.02453	0.05786	0.000592876		0.02453	0.09549	0.0006806		0.02453	0.05756	0.000593176		0.02453	0.05747	0.000591383		0.02453	0.05823	0.000602551		0.02453	0.05681	0.000598232		0.02453	0.05248	0.000588038
	0.02535	0.04999	0.000561389		0.02535	0.05153	0.000560738		0.02535	0.08426	0.000639117		0.02535	0.05403	0.000568115		0.02535	0.05385	0.000566147		0.02535	0.05487	0.000577644		0.02535	0.0548	0.000576737		0.02535	0.05004	0.00056534
	0.02617	0.0462	0.000540895		0.02617	0.04608	0.000536148		0.02617	0.07722	0.000611632		0.02617	0.05148	0.000550915		0.02617	0.05103	0.000548328		0.02617	0.05219	0.000559943		0.02617	0.05265	0.000560411		0.02617	0.04847	0.000550518
	0.02699	0.04116	0.000515125		0.02699	0.04089	0.000510121		0.02699	0.06949	0.000580859		0.02699	0.04783	0.000529054		0.02699	0.04835	0.000528973		0.02699	0.04945	0.000540176		0.02699	0.04901	0.000538395		0.02699	0.04647	0.000532617
	0.0278	0.03826	0.000497043		0.0278	0.03733	0.000490403		0.0278	0.06371	0.000556403		0.0278	0.04568	0.000513042		0.0278	0.04661	0.000514058		0.0278	0.04734	0.000524124		0.0278	0.04798	0.000525095		0.0278	0.04432	0.000516426
	0.02862	0.03482	0.00047772		0.02862	0.03406	0.000471615		0.02862	0.05879	0.000534165		0.02862	0.04356	0.000497393		0.02862	0.04486	0.000499399		0.02862	0.04527	0.00050841		0.02862	0.04587	0.000509307		0.02862	0.04224	0.000500706
	0.02944	0.03263	0.000464091		0.02944	0.03069	0.000454915		0.02944	0.053	0.000511977		0.02944	0.04128	0.0004836		0.02944	0.04262	0.000485758		0.02944	0.04423	0.000497649		0.02944	0.04325	0.000494567		0.02944	0.04047	0.000488099
	0.03067	0.02789	0.000309715		0.03067	0.02656	0.000304441		0.03067	0.04625	0.000340686		0.03067	0.03851	0.000327418		0.03067	0.03995	0.000329164		0.03067	0.04043	0.000335368		0.03067	0.04044	0.000334978		0.03067	0.03751	0.000330096
	0.0323	0.02352	0.000290701		0.0323	0.02239	0.000285923		0.0323	0.04011	0.00031894		0.0323	0.03471	0.000309716		0.0323	0.03615	0.000311529		0.0323	0.03717	0.000318453		0.0323	0.03805	0.000319653		0.0323	0.03514	0.000314808
	0.03394	0.01959	0.000273784		0.03394	0.01861	0.000269375		0.03394	0.03502	0.000300282		0.03394	0.03173	0.000294768		0.03394	0.03269	0.000295763		0.03394	0.03457	0.000304037		0.03394	0.03465	0.000303832		0.03394	0.0326	0.00030051
	0.03557	0.01705	0.000259295		0.03557	0.01607	0.000254982		0.03557	0.03006	0.000281655		0.03557	0.02915	0.000280386		0.03557	0.03031	0.000281801		0.03557	0.03101	0.000287756		0.03557	0.03148	0.000288269		0.03557	0.02905	0.000284227
	0.03721	0.01459	0.000247741		0.03721	0.01426	0.000244803		0.03721	0.02646	0.000268059		0.03721	0.02702	0.000269467		0.03721	0.02765	0.00026994		0.03721	0.02886	0.000276659		0.03721	0.02887	0.00027637		0.03721	0.02721	0.000273699
	0.03884	0.01249	0.000236593		0.03884	0.01202	0.000233447		0.03884	0.0238	0.000255981		0.03884	0.0243	0.000257251		0.03884	0.02572	0.000259184		0.03884	0.0265	0.000264998		0.03884	0.02715	0.000265852		0.03884	0.02516	0.0002626
	0.04048	0.01103	0.000227018		0.04048	0.01119	0.000225204		0.04048	0.02129	0.000244536		0.04048	0.02204	0.000246225		0.04048	0.02358	0.000248423		0.04048	0.02482	0.00025491		0.04048	0.02474	0.000254478		0.04048	0.02354	0.000252636
	0.04211	0.0093	0.000219015		0.04211	0.00942	0.000217166		0.04211	0.01877	0.000235026		0.04211	0.01982	0.000237257		0.04211	0.02107	0.000238957		0.04211	0.02213	0.000245014		0.04211	0.02228	0.000245004		0.04211	0.02098	0.000242968
	0.04375	0.00863	0.000210827		0.04375	0.00849	0.000208544		0.04375	0.01744	0.000225676		0.04375	0.01873	0.000228332		0.04375	0.01978	0.000229699		0.04375	0.02067	0.000235306		0.04375	0.02087	0.000235395		0.04375	0.01978	0.000233714
	0.04539	0.00754	0.000204176		0.04539	0.0076	0.000202322		0.04539	0.01594	0.000218205		0.04539	0.01765	0.000221601		0.04539	0.0186	0.000222791		0.04539	0.01869	0.000226877		0.04539	0.01928	0.000227682		0.04539	0.0179	0.00022546
	0.04702	0.00651	0.000197549		0.04702	0.00696	0.000196528		0.04702	0.01405	0.000210015		0.04702	0.01577	0.000213417		0.04702	0.01672	0.000214638		0.04702	0.01725	0.000219392		0.04702	0.01752	0.000219643		0.04702	0.0165	0.000218061
	0.04866	0.00592	0.000193466		0.04866	0.00595	0.00019163		0.04866	0.01303	0.000204966		0.04866	0.01411	0.00020718		0.04866	0.01537	0.000208969		0.04866	0.01564	0.000213198		0.04866	0.01552	0.000212761		0.04866	0.01497	0.000212016
	0.05029	0.00528	0.000187487		0.05029	0.00578	0.000186608		0.05029	0.01202	0.000198336		0.05029	0.01269	0.000199791		0.05029	0.01407	0.000201825		0.05029	0.01476	0.00020669		0.05029	0.01461	0.00020622		0.05029	0.01376	0.00020493
	0.05193	0.00504	0.000183181		0.05193	0.00511	0.000181509		0.05193	0.01093	0.000192416		0.05193	0.012	0.000194575		0.05193	0.01261	0.000195236		0.05193	0.01354	0.000200462		0.05193	0.01344	0.000200069		0.05193	0.01275	0.000199063
	0.05356	0.00426	0.000179631		0.05356	0.00468	0.000178634		0.05356	0.00982	0.000188152		0.05356	0.01083	0.000190195		0.05356	0.01119	0.000190428		0.05356	0.01206	0.000195477		0.05356	0.01212	0.000195378		0.05356	0.01146	0.000194437
	0.0552	0.00372	0.000175594		0.0552	0.00419	0.000174734		0.0552	0.00908	0.000183719		0.0552	0.00988	0.000185365		0.0552	0.01042	0.000185919		0.0552	0.01062	0.000189726		0.0552	0.01121	0.000190566		0.0552	0.01051	0.000189534
	0.05683	0.00346	0.000172292		0.05683	0.00406	0.000171675		0.05683	0.00836	0.000179522		0.05683	0.00889	0.00018067		0.05683	0.00949	0.000181334		0.05683	0.01006	0.000185735		0.05683	0.00995	0.000185359		0.05683	0.00995	0.000185555
	0.05847	0.00324	0.000168855		0.05847	0.0037	0.000168022		0.05847	0.00786	0.000175545		0.05847	0.00845	0.000176785		0.05847	0.0086	0.00017669		0.05847	0.0094	0.00018141		0.05847	0.0096	0.000181581		0.05847	0.00911	0.000180913
	0.0601	0.00294	0.000165412		0.0601	0.00363	0.000165015		0.0601	0.00741	0.000171804		0.0601	0.00751	0.000172184		0.0601	0.00812	0.000172875		0.0601	0.00846	0.000176739		0.0601	0.0086	0.000176804		0.0601	0.00829	0.00017645
	0.06256	0.00289	0.000114288		0.06256	0.00318	0.000113518		0.06256	0.00675	0.000117993		0.06256	0.00677	0.000118152		0.06256	0.00728	0.000118538		0.06256	0.00751	0.000121079		0.06256	0.00779	0.000121289		0.06256	0.00746	0.000121019
	0.06583	0.00232	0.000110897		0.06583	0.00259	0.000110123		0.06583	0.00546	0.000113669		0.06583	0.00556	0.000113909		0.06583	0.00583	0.000114004		0.06583	0.00604	0.00011647		0.06583	0.00623	0.000116581		0.06583	0.0063	0.000116781
	0.0691	0.00243	0.000107819		0.0691	0.00265	0.000106992		0.0691	0.00509	0.000109953		0.0691	0.005	0.00010997		0.0691	0.0052	0.000109989		0.0691	0.00566	0.00011267		0.0691	0.0057	0.000112616		0.0691	0.00564	0.000112662
	0.07237	0.00184	0.000104768		0.07237	0.00217	0.000104101		0.07237	0.00427	0.000106617		0.07237	0.00415	0.000106584		0.07237	0.0043	0.00010655		0.07237	0.00468	0.000109081		0.07237	0.00478	0.000109104		0.07237	0.00474	0.000109155
	0.07564	0.00185	0.000102008		0.07564	0.00213	0.000101303		0.07564	0.00401	0.000103508		0.07564	0.00368	0.000103238		0.07564	0.00405	0.000103468		0.07564	0.00418	0.000105647		0.07564	0.00425	0.000105631		0.07564	0.00434	0.000105835
	0.07891	0.00178	9.98524e-05		0.07891	0.00195	9.9031e-05		0.07891	0.00353	0.000100856		0.07891	0.00328	0.000100683		0.07891	0.00326	0.000100469		0.07891	0.00373	0.000102989		0.07891	0.00382	0.000102999		0.07891	0.00389	0.00010318
	0.08218	0.0014	9.7208e-05		0.08218	0.00178	9.66451e-05		0.08218	0.00333	9.84097e-05		0.08218	0.00276	9.78769e-05		0.08218	0.00296	9.79121e-05		0.08218	0.00309	9.99988e-05		0.08218	0.00338	0.000100237		0.08218	0.00335	0.000100297
	0.08546	0.00132	9.52005e-05		0.08546	0.0016	9.4534e-05		0.08546	0.0031	9.62129e-05		0.08546	0.00253	9.56844e-05		0.08546	0.00269	9.56841e-05		0.08546	0.00294	9.78669e-05		0.08546	0.00308	9.79295e-05		0.08546	0.00324	9.81966e-05
	0.08873	0.00143	9.35718e-05		0.08873	0.00166	9.28711e-05		0.08873	0.00295	9.42856e-05		0.08873	0.00253	9.39393e-05		0.08873	0.00263	9.38666e-05		0.08873	0.00271	9.58262e-05		0.08873	0.00274	9.57685e-05		0.08873	0.00302	9.61655e-05
	0.092	0.00128	9.16607e-05		0.092	0.00152	9.09827e-05		0.092	0.00269	9.2247e-05		0.092	0.00227	9.18937e-05		0.092	0.00254	9.20021e-05		0.092	0.00265	9.39602e-05		0.092	0.0027	9.39298e-05		0.092	0.00277	9.40895e-05
	0.09527	0.00135	8.98706e-05		0.09527	0.0015	8.91171e-05		0.09527	0.00264	9.03266e-05		0.09527	0.00226	9.00256e-05		0.09527	0.00229	8.98903e-05		0.09527	0.00259	9.19977e-05		0.09527	0.00261	9.19388e-05		0.09527	0.00273	9.21495e-05
	0.09854	0.00111	8.81136e-05		0.09854	0.00134	8.74543e-05		0.09854	0.00241	8.85713e-05		0.09854	0.0021	8.83499e-05		0.09854	0.00214	8.82276e-05		0.09854	0.00242	9.02851e-05		0.09854	0.00241	9.01881e-05		0.09854	0.00254	9.04096e-05
	0.10345	0.00113	6.08532e-05		0.10345	0.00121	6.02874e-05		0.10345	0.00223	6.10339e-05		0.10345	0.00192	6.0873e-05		0.10345	0.0019	6.0748e-05		0.10345	0.00212	6.21264e-05		0.10345	0.00217	6.21012e-05		0.10345	0.00231	6.22652e-05
	0.10999	0.00108	5.88756e-05		0.10999	0.0012	5.83547e-05		0.10999	0.00209	5.89809e-05		0.10999	0.00176	5.88168e-05		0.10999	0.00175	5.87006e-05		0.10999	0.00183	5.99389e-05		0.10999	0.00191	5.99422e-05		0.10999	0.0021	6.01253e-05
	0.11653	0.000786311	5.68843e-05		0.11653	0.00107	5.64903e-05		0.11653	0.00195	5.70955e-05		0.11653	0.00165	5.69563e-05		0.11653	0.00163	5.68339e-05		0.11653	0.00162	5.79769e-05		0.11653	0.0018	5.80445e-05		0.11653	0.0018	5.80984e-05
	0.12307	0.000729564	5.53234e-05		0.12307	0.000909054	5.4873e-05		0.12307	0.00167	5.53834e-05		0.12307	0.00133	5.52157e-05		0.12307	0.00137	5.51399e-05		0.12307	0.00145	5.63099e-05		0.12307	0.0015	5.6293e-05		0.12307	0.00161	5.64193e-05
	0.12961	0.00078556	5.3713e-05		0.12961	0.000941006	5.32614e-05		0.12961	0.00159	5.36861e-05		0.12961	0.00132	5.35725e-05		0.12961	0.00138	5.35101e-05		0.12961	0.0013	5.45392e-05		0.12961	0.00135	5.45241e-05		0.12961	0.00147	5.46529e-05
	0.13615	0.000720056	5.22387e-05		0.13615	0.000857285	5.1788e-05		0.13615	0.00157	5.2243e-05		0.13615	0.00133	5.21491e-05		0.13615	0.00128	5.20175e-05		0.13615	0.00135	5.31201e-05		0.13615	0.00128	5.30251e-05		0.13615	0.00141	5.31582e-05
	0.14269	0.000650659	5.09335e-05		0.14269	0.000768525	5.04817e-05		0.14269	0.00138	5.08626e-05		0.14269	0.00117	5.07904e-05		0.14269	0.00107	5.06337e-05		0.14269	0.00116	5.17208e-05		0.14269	0.00114	5.16607e-05		0.14269	0.0012	5.17462e-05
	0.14924	0.000606567	4.97694e-05		0.14924	0.000707171	4.93173e-05		0.14924	0.00127	4.96608e-05		0.14924	0.00104	4.95759e-05		0.14924	0.000985893	4.94531e-05		0.14924	0.00102	5.04769e-05		0.14924	0.00101	5.04276e-05		0.14924	0.00104	5.04933e-05
	0.15578	0.000554807	4.86312e-05		0.15578	0.000668405	4.81967e-05		0.15578	0.00113	4.84753e-05		0.15578	0.001	4.84505e-05		0.15578	0.000925811	4.83171e-05		0.15578	0.000968155	4.93246e-05		0.15578	0.000814516	4.91929e-05		0.15578	0.000903184	4.92897e-05
	0.16232	0.000547874	4.74923e-05		0.16232	0.000586052	4.70252e-05		0.16232	0.00105	4.72986e-05		0.16232	0.00078722	4.71986e-05		0.16232	0.000797617	4.71174e-05		0.16232	0.000733942	4.80409e-05		0.16232	0.000656298	4.79553e-05		0.16232	0.000819548	4.80923e-05
	0.16886	0.000511134	4.6368e-05		0.16886	0.000621081	4.5952e-05		0.16886	0.000976754	4.6161e-05		0.16886	0.000838236	4.61309e-05		0.16886	0.000738109	4.59896e-05		0.16886	0.000718501	4.69161e-05		0.16886	0.000707356	4.68697e-05		0.16886	0.000822058	4.69768e-05
	0.1754	0.000488466	4.54357e-05		0.1754	0.000499194	4.49734e-05		0.1754	0.000745703	4.51183e-05		0.1754	0.000624827	4.5098e-05		0.1754	0.000579214	4.49899e-05		0.1754	0.000642871	4.59439e-05		0.1754	0.000581018	4.58705e-05		0.1754	0.00069511	4.5975e-05
	0.18194	0.000440731	4.45126e-05		0.18194	0.000410473	4.40376e-05		0.18194	0.000653904	4.4178e-05		0.18194	0.000758187	4.42795e-05		0.18194	0.000558179	4.40904e-05		0.18194	0.000580199	4.50029e-05		0.18194	0.000529368	4.4937e-05		0.18194	0.000645684	4.50405e-05
	0.18848	0.000468225	4.36378e-05		0.18848	0.000482411	4.31955e-05		0.18848	0.000654407	4.32955e-05		0.18848	0.000640002	4.33322e-05		0.18848	0.000463089	4.31591e-05		0.18848	0.000487661	4.40548e-05		0.18848	0.000474395	4.401e-05		0.18848	0.000535438	4.40824e-05
	0.19502	0.000449097	4.27526e-05		0.19502	0.000449061	4.2312e-05		0.19502	0.000662407	4.24318e-05		0.19502	0.000627742	4.24573e-05		0.19502	0.000452916	4.22883e-05		0.19502	0.000465259	4.31598e-05		0.19502	0.000414625	4.30966e-05		0.19502	0.000557123	4.32098e-05
	0.20156	0.000412265	4.18928e-05		0.20156	0.000360802	4.14345e-05		0.20156	0.00055159	4.15409e-05		0.20156	0.00057199	4.15937e-05		0.20156	0.000512742	4.1487e-05		0.20156	0.000447755	4.23018e-05		0.20156	0.000404346	4.22435e-05		0.20156	0.000441543	4.2301e-05
	0.2081	0.000374684	4.12216e-05		0.2081	0.00025031	4.0734e-05		0.2081	0.000443826	4.08397e-05		0.2081	0.000497042	4.0908e-05		0.2081	0.000404475	4.07866e-05		0.2081	0.000340922	4.15896e-05		0.2081	0.000264061	4.15156e-05		0.2081	0.00038428	4.16136e-05
	0.21464	0.000399291	4.03714e-05		0.21464	0.000374902	3.9943e-05		0.21464	0.000499419	4.0013e-05		0.21464	0.000559235	4.00836e-05		0.21464	0.000454867	3.99584e-05		0.21464	0.000463383	4.07798e-05		0.21464	0.000431363	4.07292e-05		0.21464	0.00041973	4.07605e-05
	0.22118	0.000374449	3.97124e-05		0.22118	0.000312048	3.92724e-05		0.22118	0.000420319	3.93332e-05		0.22118	0.000526999	3.94254e-05		0.22118	0.000428491	3.93052e-05		0.22118	0.000377099	4.00844e-05		0.22118	0.000367067	4.00453e-05		0.22118	0.000443094	4.01187e-05
	0.22772	0.000376245	3.90643e-05		0.22772	0.000334613	3.86415e-05		0.22772	0.000383655	3.86731e-05		0.22772	0.000498971	3.87677e-05		0.22772	0.000368068	3.86341e-05		0.22772	0.00037446	3.94282e-05		0.22772	0.000303029	3.93606e-05		0.22772	0.000363736	3.94252e-05
	0.23427	0.000296778	3.83959e-05		0.23427	0.000317494	3.80092e-05		0.23427	0.000295034	3.80067e-05		0.23427	0.000435162	3.81113e-05		0.23427	0.000388447	3.80197e-05		0.23427	0.000295448	3.87542e-05		0.23427	0.000280553	3.8714e-05		0.23427	0.000421382	3.88155e-05
	0.24081	0.000352438	3.77815e-05		0.24081	0.000393928	3.74109e-05		0.24081	0.000369249	3.74073e-05		0.24081	0.000492607	3.75026e-05		0.24081	0.000404198	3.7393e-05		0.24081	0.000361849	3.81388e-05		0.24081	0.0002851	3.80707e-05		0.24081	0.000367802	3.81435e-05
	0.24735	0.000377816	3.71944e-05		0.24735	0.000308612	3.67791e-05		0.24735	0.000348583	3.68051e-05		0.24735	0.000435978	3.68825e-05		0.24735	0.000420955	3.68081e-05		0.24735	0.000311489	3.75114e-05		0.24735	0.000313221	3.74801e-05		0.24735	0.000387297	3.7548e-05
	0.25389	0.000347427	3.65881e-05		0.25389	0.000266972	3.61744e-05		0.25389	0.000301394	3.61975e-05		0.25389	0.000447516	3.63002e-05		0.25389	0.000346698	3.61884e-05		0.25389	0.000317654	3.69165e-05		0.25389	0.00026151	3.68599e-05		0.25389	0.000360839	3.69379e-05
	0.26042	0.000354614	3.60291e-05		0.26042	0.000266935	3.56186e-05		0.26042	0.000301589	3.56414e-05		0.26042	0.000435219	3.5737e-05		0.26042	0.000392146	3.56524e-05		0.26042	0.000273602	3.63297e-05		0.26042	0.00024117	3.62844e-05		0.26042	0.000299832	3.63433e-05
	0.26696	0.000285559	3.54555e-05		0.26696	0.000292062	3.50922e-05		0.26696	0.000295898	3.51013e-05		0.26696	0.000373802	3.51711e-05		0.26696	0.000319266	3.50829e-05		0.26696	0.00024001	3.57671e-05		0.26696	0.000226864	3.57308e-05		0.26696	0.000315609	3.5802e-05
	0.2735	0.000352625	3.50179e-05		0.2735	0.000243195	3.46095e-05		0.2735	0.00028979	3.46368e-05		0.2735	0.000426305	3.47309e-05		0.2735	0.000319861	3.46216e-05		0.2735	0.000284929	3.53159e-05		0.2735	0.000224495	3.52598e-05		0.2735	0.000323554	3.53343e-05
	0.28004	0.000314172	3.4471e-05		0.28004	0.00031902	3.41172e-05		0.28004	0.000341026	3.41337e-05		0.28004	0.000434679	3.42083e-05		0.28004	0.000362883	3.41152e-05		0.28004	0.000291438	3.47835e-05		0.28004	0.000237801	3.47312e-05		0.28004	0.0003523	3.48112e-05
	0.28658	0.000340471	3.40007e-05		0.28658	0.000289862	3.36287e-05		0.28658	0.000338605	3.36561e-05		0.28658	0.000425328	3.37268e-05		0.28658	0.000351632	3.36342e-05		0.28658	0.000283709	3.42946e-05		0.28658	0.000246582	3.42498e-05		0.28658	0.00033532	3.4318e-05
	0.29312	0.000404102	3.35255e-05		0.29312	0.000366319	3.31642e-05		0.29312	0.000372776	3.31738e-05		0.29312	0.0005107	3.32646e-05		0.29312	0.000423832	3.31679e-05		0.29312	0.000356498	3.38187e-05		0.29312	0.000288161	3.37617e-05		0.29312	0.000401974	3.38393e-05
	0.29966	0.000295262	3.31368e-05		0.29966	0.000281196	3.2789e-05		0.29966	0.000229942	3.2775e-05		0.29966	0.000396798	3.28762e-05		0.29966	0.000320335	3.27851e-05		0.29966	0.000227687	3.34192e-05		0.29966	0.000248946	3.33993e-05		0.29966	0.00027754	3.34411e-05
	0.3062	0.000300728	3.29446e-05		0.3062	0.000250509	3.25843e-05		0.3062	0.000282822	3.26041e-05		0.3062	0.000417834	3.26916e-05		0.3062	0.000335759	3.25988e-05		0.3062	0.000205924	3.32145e-05		0.3062	0.000154499	3.31657e-05		0.3062	0.000260768	3.32383e-05
	0.31274	0.000364833	3.34272e-05		0.31274	0.000333225	3.30695e-05		0.31274	0.000297589	3.30619e-05		0.31274	0.000480962	3.31701e-05		0.31274	0.000336575	3.30508e-05		0.31274	0.00031155	3.37177e-05		0.31274	0.000270944	3.36725e-05		0.31274	0.000347049	3.37339e-05
	0.31928	0.000368789	3.43077e-05		0.31928	0.000313303	3.39307e-05		0.31928	0.000332058	3.39456e-05		0.31928	0.000499732	3.405e-05		0.31928	0.000366276	3.39322e-05		0.31928	0.000332135	3.46128e-05		0.31928	0.000249674	3.4549e-05		0.31928	0.000364563	3.46282e-05
	0.32581	0.000363286	3.74555e-05		0.32581	0.000267485	3.70254e-05		0.32581	0.000385675	3.7087e-05		0.32581	0.000430431	3.71452e-05		0.32581	0.000334508	3.70335e-05		0.32581	0.00026908	3.77623e-05		0.32581	0.000209408	3.77029e-05		0.32581	0.000306903	3.77815e-05
	0.33235	0.000311516	3.97267e-05		0.33235	0.000297129	3.93095e-05		0.33235	0.000346023	3.93415e-05		0.33235	0.000501816	3.94575e-05		0.33235	0.000354595	3.93136e-05		0.33235	0.000305222	4.00949e-05		0.33235	0.00024267	4.00303e-05		0.33235	0.000342669	4.01153e-05
	0.33889	0.000388836	4.17958e-05		0.33889	0.000306532	4.13224e-05		0.33889	0.000372527	4.1365e-05		0.33889	0.000421558	4.14323e-05		0.33889	0.000388966	4.13397e-05		0.33889	0.00029589	4.21383e-05		0.33889	0.000280466	4.20945e-05		0.33889	0.000350491	4.21685e-05
	0.34543	0.000391704	4.38002e-05		0.34543	0.00030559	4.33023e-05		0.34543	0.000299466	4.33079e-05		0.34543	0.000484569	4.34518e-05		0.34543	0.000382619	4.33174e-05		0.34543	0.000319529	4.41704e-05		0.34543	0.000236829	4.40883e-05		0.34543	0.000342416	4.41849e-05
	0.35197	0.000308089	4.58419e-05		0.35197	0.000216338	4.53171e-05		0.35197	0.000234661	4.53368e-05		0.35197	0.000420153	4.54874e-05		0.35197	0.000318487	4.53472e-05		0.35197	0.00019747	4.62081e-05		0.35197	0.000199081	4.61697e-05		0.35197	0.000339614	4.62904e-05
	0.3585	0.000382061	4.797e-05		0.3585	0.000287028	4.74192e-05		0.3585	0.000348323	4.74653e-05		0.3585	0.000439591	4.75676e-05		0.3585	0.000416697	4.7467e-05		0.3585	0.000305421	4.83728e-05		0.3585	0.000270003	4.83106e-05		0.3585	0.000341605	4.83966e-05
	0.36504	0.000246267	5.02471e-05		0.36504	0.00028672	4.97531e-05		0.36504	0.00028558	4.97627e-05		0.36504	0.000351017	4.98538e-05		0.36504	0.000328309	4.97486e-05		0.36504	0.000274107	5.07344e-05		0.36504	0.000220077	5.06578e-05		0.36504	0.000270472	5.07349e-05
	0.37158	0.000311507	5.28375e-05		0.37158	0.00033321	5.23062e-05		0.37158	0.000309898	5.23021e-05		0.37158	0.000404418	5.24166e-05		0.37158	0.000345871	5.22826e-05		0.37158	0.000305909	5.3328e-05		0.37158	0.000141964	5.31763e-05		0.37158	0.000259389	5.33007e-05
	0.37811	0.000470505	5.5557e-05		0.37811	0.000291792	5.48625e-05		0.37811	0.000355518	5.49179e-05		0.37811	0.000543727	5.51024e-05		0.37811	0.000317049	5.48468e-05		0.37811	0.000402805	5.60289e-05		0.37811	0.000253579	5.58795e-05		0.37811	0.000457648	5.60692e-05
	0.38465	0.000254941	5.89312e-05		0.38465	0.000247804	5.83181e-05		0.38465	0.000269749	5.83452e-05		0.38465	0.000365729	5.84737e-05		0.38465	0.000285366	5.83092e-05		0.38465	0.000157742	5.9413e-05		0.38465	0.000192038	5.93867e-05		0.38465	0.000205544	5.94499e-05
	0.39119	0.000291311	6.24939e-05		0.39119	0.000217216	6.17919e-05		0.39119	0.000273408	6.18476e-05		0.39119	0.000389147	6.19993e-05		0.39119	0.000239139	6.17714e-05		0.39119	0.000204025	6.30117e-05		0.39119	0.00017669	6.2937e-05		0.39119	0.000278219	6.30715e-05
	0.39772	0.0004216	6.69574e-05		0.39772	0.000379839	6.62335e-05		0.39772	0.000390437	6.6256e-05		0.39772	0.000402292	6.63326e-05		0.39772	0.000312221	6.61387e-05		0.39772	0.000289008	6.74747e-05		0.39772	0.000290958	6.74189e-05		0.39772	0.000338311	6.75183e-05
	0.40426	0.000340639	7.23836e-05		0.40426	0.000253597	7.15616e-05		0.40426	0.000280798	7.15994e-05		0.40426	0.000260225	7.16552e-05		0.40426	0.000308936	7.15665e-05		0.40426	0.000271368	7.30004e-05		0.40426	0.000157844	7.28403e-05		0.40426	0.000297005	7.30267e-05
	0.4108	0.000373418	7.93232e-05		0.4108	0.000447627	7.85749e-05		0.4108	0.000466514	7.8608e-05		0.4108	0.000538824	7.87572e-05		0.4108	0.000423902	7.85044e-05		0.4108	0.000306322	7.99997e-05		0.4108	0.000253237	7.98828e-05		0.4108	0.000432644	8.0123e-05
	0.4157	0.000328809	0.000121797		0.4157	0.000260521	0.000120443		0.4157	0.00045095	0.000120735		0.4157	0.00057403	0.000121038		0.4157	0.00028447	0.000120401		0.4157	0.000330487	0.000122935		0.4157	0.000278198	0.000122757		0.4157	0.000237202	0.00012281
