# Supplementary material for: Structural and regulatory insights into the glideosome-associated connector from Toxoplasma gondii
Source: eLife journal article supplement (doi:10.7554/elife.86049), 2023-04-04
Supplement: fig5-data3 [file Liposomebinding.xlsx]

## Sheet: Panel A
	GAC-FL X	GAC-FL 0	GAC-FL 50	GAC-PH X	GAC-PH 0	GAC-PH 50	APH X	APH 0	APH 50
Replicate 1	96.96	94.75	18.61	94.85	82.02	21.83	95.49	95.67	2.87
Replicate 2	91.36	94.87	10.33	91.79	89.48	37.66	95.45	94.45	3.68

## Sheet: Panel B
	FL-WTX	FL-WT0	FL-WT40	FL-RKX	FL-RK0	FL-RK40	FL-KERX	FL-KER0	FL-KER40	FL-RKKERX	FL-RKKER0	FL-RKKER40
Replicate 1	6.56	23.73	60.94							5.6	12.98	21.73
Replicate 2	2.69	9.96	63.82							2.37	6.83	17.35
Replicate 3	3.6	11.62	68.44	4.97	12.1	20.15	3.54	8.5	68.93	3.24	3.13	7.99
Replicate 4	1.88	8.57	58.19	4.05	6.06	19.61	1.75	10.44	66.22	2.09	4.28	15.21

## Sheet: Panel C
	PH-WTX	PH-WT0	PH-WT40	PH-RKX	PH-RK0	PH-RK40	PH-KERX	PH-KER0	PH-KER40	PH-RKKERX	PH-RKKER0	PH-RKKER40
Replicate 1	14.18	11.76	79.48							9.99	12.86	30.71
Replicate 2	8.89	4.56	75.54							5.86	6.54	34.2
Replicate 3	1.51	3.81	78.91				1.5	2.41	2.93
Replicate 4	5.31	4.83	79.65	7.33	17.97	72.85	6.03	8.62	6.73
Replicate 5	4.04	5.91	88.05	6.1	11	83.93	6.68	6.06	6.28	5.09	6.74	29.13
