# Supplementary material for: Structural and regulatory insights into the glideosome-associated connector from Toxoplasma gondii
Source: eLife journal article supplement (doi:10.7554/elife.86049), 2023-04-04
Supplement: fig6-data1 [file Invasion.xlsx]

## Sheet: Feuil1
27.05.2019 - Exp.3	Ku80	PH_WT	PH_RK	PH_KER	PH_RKKER	PH_Chimera
INVADED	156	102	133	131	91	90
NOT INVADED	44	98	67	69	109	110
Percentage invasion	78	51	66.5	65.5	45.5	45
9.04.2019 - Exp.2	Ku80	PH_WT	PH_RK	PH_KER	PH_RKKER	PH_Chimera
INVADED	127	138	134	109	133	98
NOT INVADED	73	62	66	91	67	102
Percent. Inv	63.5	69	67	54.5	66.5	49
2.04.2019 - Exp.1	Ku80	PH_WT	PH_RK	PH_KER	PH_RKKER	PH_Chimera
INVADED	129	139	125	128	122	86
NOT INVADED	71	61	75	72	78	114
Percent. Inv	64.5	69.5	62.5	64	61	43
