# Supplementary material for: Structural and regulatory insights into the glideosome-associated connector from Toxoplasma gondii
Source: eLife journal article supplement (doi:10.7554/elife.86049), 2023-04-04
Supplement: fig7-data2 [file elife-86049-fig7-data2-v2.pdf]

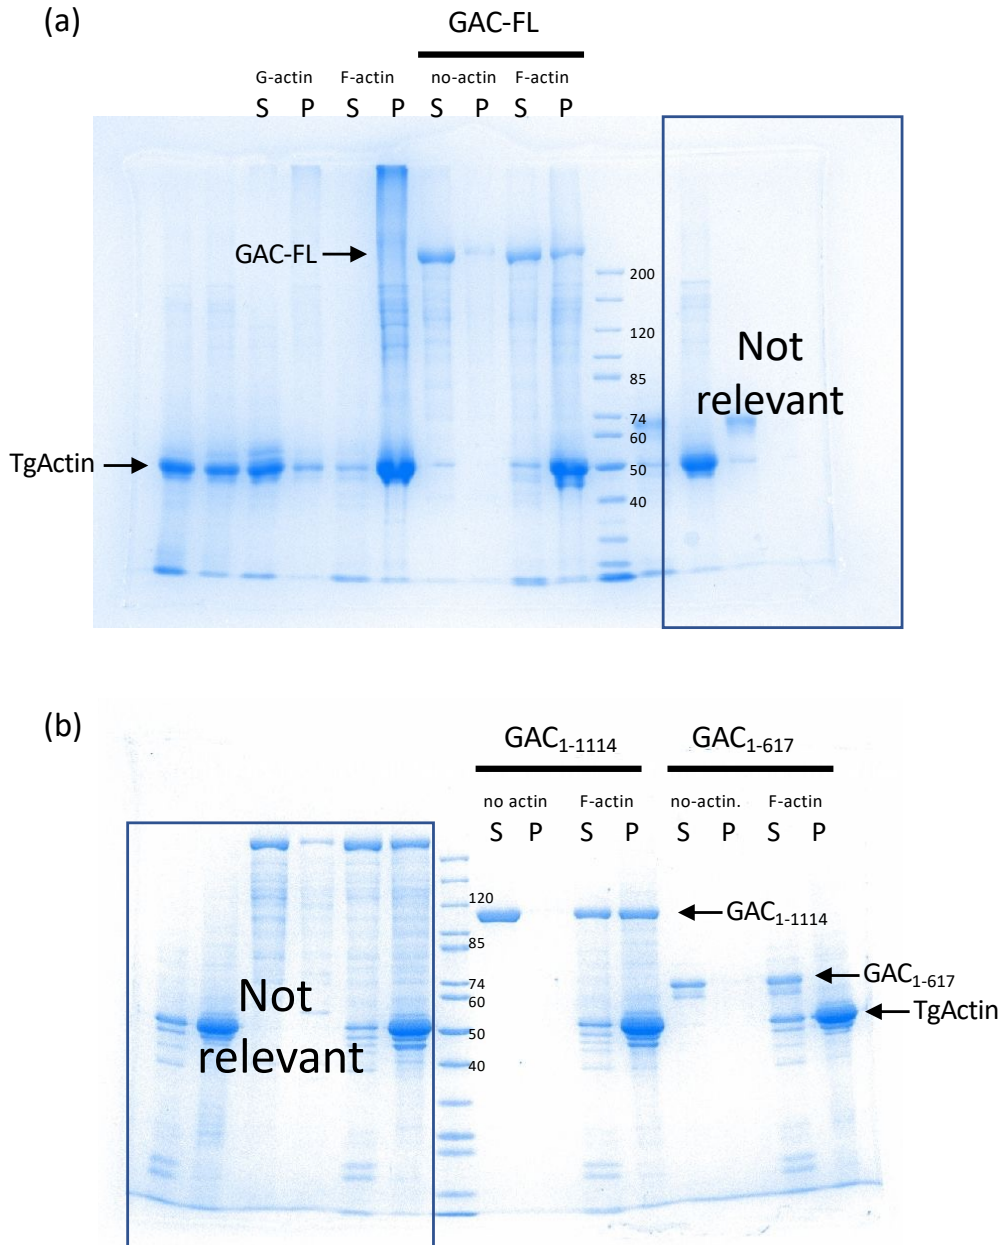

**Figure 7 Source data 2:** GAC interaction with TgActin filaments. (a) Coomassie-stained gel analysing full-length TgGAC (GAC-FL) remaining in supernatant or sedimenting upon centrifugation at 100'000 g. S: Supernatant. P: Pellet. (b) Coomassie-stained gel analysing truncated TgGAC (TgGAC<sub>1-1114</sub> and TgGAC<sub>1-617</sub>) remaining in supernatant or sedimenting upon centrifugation at 100'000 g. S: Supernatant. P: Pellet. Key molecular weight markers indicated in kDa.
