# Supplementary material for: Structural and regulatory insights into the glideosome-associated connector from Toxoplasma gondii
Source: eLife. 2023 Apr 4;12:e86049. doi: 10.7554/eLife.86049 (PMC10125020; doi:10.7554/eLife.86049)
Supplement: Supplementary file 1. — Results are shown both as percentage deuteration compared to a theoretical maximal deuteration level and as number of deuterons incorporated into the peptide (#D). [file elife-86049-supp1.xlsx]

## Sheet: HDX-MS analysis
	HDX-MS analysis
	Experiment was done using protein stocks
	Reactions were run in 50 ul volume
	Deuterium uptake for each of the conditionsis listed below
	Manual validation of each of the peptides was done
	RESULT TABLE :
	Deuterium incorporation for each of the selected peptides used for HDX-MS analysis are presented.
	Results are shown both as percentage deuteration compared to a theoretical maximal deuteration level and as number of deuterons incorporated into the peptide (#D)
							GAC N100					GAC N100								GAC N70													GAC FL
						Deuteration Levels					Deuteration Levels								Deuteration Levels					Deuteration Levels								Deuteration Levels					Deuteration Levels
						Percentage (%)					Number of deuterons (#D)								Percentage (%)					Number of deuterons (#D)								Percentage (%)					Number of deuterons (#D)
						3s	30s	300s	0	0	3s	30s	300s	0	0				3s	30s	300s	0	0	3s	30s	300s	0	0				3s	30s	300s	0	0	3s	30s	300s	0	0
Start	End	Charge	Search RT	Sequence
16	32	3	13.11	TAVQSVIQHQTFKRMLL		30.9573	38.9757	54.219			3.66833	4.61867	6.425						31.2183	43.236	65.0307			3.69933	5.12333	7.706						30.2977	41.0107	56.5203			3.59033	4.85967	6.69767
17	32	3	11.92	AVQSVIQHQTFKRMLL		31.2177	40.526	50.713			3.453	4.48233	5.60867						31.9967	41.3857	57.0537			3.53867	4.57733	6.31						28.3613	37.955	53.3633			3.13633	4.19767	5.902
20	27	2	6.99	SVIQHQTF		37.2263	39.3203	50.6073			1.76467	1.864	2.39867						35.8557	39.873	53.2837			1.69933	1.89	2.526						34.581	36.9523	52.1393			1.639	1.75167	2.47133
20	32	4	10.58	SVIQHQTFKRMLL		36.4017	42.51	53.0923			3.16333	3.69433	4.61367						34.1343	42.047	53.3647			2.96633	3.654	4.63733						31.8813	38.2743	51.6163			2.77033	3.326	4.48533
33	40	2	11.45	FGLRSLAD		3.82833	11.9273	15.4517			0.181333	0.565333	0.732333						4.03267	12.151	16.64			0.191333	0.576	0.788667						4.68333	15.3863	26.4407			0.222	0.729333	1.25333
33	41	2	17.03	FGLRSLADF		6.05967	8.684	10.7077			0.335	0.480333	0.592333						2.92433	8.70633	11.2013			0.162	0.481667	0.619667						5.28967	15.119	24.943			0.292333	0.836	1.37967
41	48	2	9.66	FCSPSNQL		50.8537	70.1587	72.0433			2.00867	2.77133	2.84567						49.5893	67.9207	70.4393			1.959	2.683	2.78233						51.5393	66.3223	73.7877			2.03567	2.61967	2.91467
42	48	1	4.74	CSPSNQL		72.5177	101.908	105.943			2.29167	3.22067	3.348						75.1567	103.425	107.497			2.37467	3.26833	3.397						71.8783	94.6023	100.693			2.27167	2.98967	3.182
49	64	2	16.94	YQENALDALDRGVLSA		22.0793	32.6377	43.7367			2.442	3.60967	4.83733						20.0183	34.3803	45.498			2.214	3.80233	5.03233						18.261	37.192	51.8863			2.01967	4.11333	5.73833
55	62	2	10.06	DALDRGVL		9.75067	33.8133	51.1893			0.462333	1.60267	2.42633						8.14933	32.4843	51.1453			0.386333	1.53967	2.42433						11.5217	36.27	56.408			0.546	1.719	2.67367
55	64	1	9.29	DALDRGVLSA		30.69	52.8683	67.723			1.93933	3.34133	4.28						31.0677	52.9257	67.6347			1.96367	3.345	4.27467						31.7013	53.32	70.4697			2.00367	3.36967	4.45367
55	64	2	9.29	DALDRGVLSA		32.1977	53.178	69.359			2.035	3.361	4.38333						31.9717	54.3187	68.676			2.02067	3.433	4.34033						33.0943	52.9763	71.3923			2.09167	3.34833	4.51167
56	64	2	7.7	ALDRGVLSA		34.759	57.3587	74.6883			1.92233	3.172	4.13033						35.0497	59.4613	74.8853			1.938	3.288	4.14133						37.913	59.9647	73.2723			2.09633	3.316	4.05167
63	72	1	13.27	SAIQTAVTTF		11.8	54.715	74.48			0.745667	3.45833	4.70733						13.782	54.2503	74.9783			0.871	3.42867	4.73867						12.09	51.762	78.5093			0.764333	3.27133	4.962
63	78	2	17.38	SAIQTAVTTFSDDDDL		32.5927	55.3797	68.1757			3.60467	6.125	7.54						28.1847	52.6567	65.9037			3.11733	5.824	7.28933						29.0973	53.0343	69.8477			3.218	5.86567	7.72533
63	80	2	19.33	SAIQTAVTTFSDDDDLML		24.361	45.7367	62.2595			3.07933	5.78133	7.8695						22.4307	43.7153	61.2073			2.83533	5.52567	7.73667						28.9167	50.9823	64.926			3.65533	6.44433	8.2065
65	78	2	13.5	IQTAVTTFSDDDDL		21.0073	37.107	48.2877			1.99133	3.51767	4.57767						17.295	34.1953	46.537			1.63933	3.242	4.412						22.2867	36.608	52.446			2.113	3.47033	4.972
65	80	2	17.98	IQTAVTTFSDDDDLML		14.9377	28.043	44.319			1.652	3.10167	4.902						12.304	25.725	40.5553			1.361	2.845	4.48533						15.6927	29.164	44.5537			1.736	3.22567	4.92767
68	77	1	6.88	AVTTFSDDDD		34.7463	52.0563	66.0937			2.196	3.29	4.177						34.4853	50.9847	65.1417			2.17933	3.22233	4.11667						33.6053	46.9967	61.4737			2.12367	2.97033	3.885
68	78	1	11.77	AVTTFSDDDDL		21.7973	33.7183	47.2023			1.54967	2.39767	3.35633						17.9267	31.1377	43.9267			1.27433	2.214	3.123						21.3003	33.0083	47.5273			1.51467	2.347	3.379
68	80	2	17.17	AVTTFSDDDDLML		12.8057	19.7377	36.024			1.113	1.71533	3.13033						10.505	17.9033	32.816			0.913	1.55567	2.85167						18.5	24.5177	40.5937			1.60733	2.13033	3.52733
72	80	1	16.09	FSDDDDLML		2.49567	3.342	14.673			0.138	0.184667	0.811333						2.09933	4.67567	16.127			0.116	0.258333	0.891667						5.196	6.393	24.141			0.287667	0.353667	1.335
73	78	1	4.35	SDDDDL		25.8463	26.1553	35.152			0.816667	0.826667	1.11067						26.1957	26.5773	34.8887			0.827667	0.84	1.10267						26.127	26.112	39.1507			0.825667	0.825333	1.23733
73	80	1	13.76	SDDDDLML		4.52867	5.42933	21.4387			0.214333	0.257333	1.016						2.98333	4.48	19.706			0.141667	0.212	0.934333						5.99833	9.085	25.7803			0.284	0.430667	1.22167
81	88	2	11.49	CASRVLWA		0.628333	0.606333	0.274333			0.0296667	0.0286667	0.013						0.391	0.461	0.459			0.0183333	0.022	0.0216667						1.33133	2.03933	5.706			0.063	0.0966667	0.270333
81	90	2	13.82	CASRVLWAMS		0.033	-0.932333	-1.07667			0.00233333	-0.059	-0.068						-0.745	-0.925	-0.609667			-0.047	-0.0586667	-0.0383333						0.839333	0.807	4.13233			0.053	0.0506667	0.261333
81	91	2	16.85	CASRVLWAMSV		1.35667	2.58133	3.556			0.0963333	0.183667	0.252667						1.331	-0.127	0.239667			0.142	-0.009	0.017						5.409	6.476	8.75333			0.384667	0.460667	0.622333
83	88	1	10.99	SRVLWA		-0.52	2.858	1.79367			-0.0163333	0.0903333	0.0566667						0.930667	2.18667	2.59			0.0293333	0.069	0.0816667						-0.0513333	1.704	4.386			-0.00166667	0.0536667	0.138333
83	90	2	13.91	SRVLWAMS		2.40067	4.511	1.19367			0.113667	0.214	0.0563333						0.195667	0.428667	0.112333			0.00933333	0.0206667	0.00533333						6.983	8.27033	10.508			0.330667	0.392	0.498
91	114	3	10.47	VAIKEEMDPAHIARVHSEGSPVIV		14.1087	19.3647	29.474			2.229	3.05967	4.657						15.268	19.496	30.0613			2.41267	3.08	4.74967						17.6087	21.2403	31.623			2.782	3.35633	4.99633
91	115	3	10.08	VAIKEEMDPAHIARVHSEGSPVIVA		14.406	18.037	27.541			2.39	2.992	4.569						13.829	18.4693	28.7693			2.29433	3.064	4.773						13.3437	16.992	27.2937			2.21367	2.819	4.528
92	114	3	9.9	AIKEEMDPAHIARVHSEGSPVIV		14.99	19.3723	29.8437			2.25033	2.90767	4.47967						15.1087	18.6687	28.5687			2.268	2.802	4.28833						14.073	17.5023	35.3597			2.11233	2.627	5.30733
92	115	3	9.54	AIKEEMDPAHIARVHSEGSPVIVA		13.1083	17.975	28.6827			2.07133	2.84	4.53167						14.0077	17.731	27.344			2.21333	2.80167	4.32067						16.5755	16.8223	34.511			2.619	2.65767	5.45267
93	115	3	9.24	IKEEMDPAHIARVHSEGSPVIVA		14.782	19.077	29.613			2.21867	2.86367	4.445						15.9413	19.347	30.911			2.393	2.904	4.64						13.4403	17.918	34.7363			2.01767	2.68967	5.21367
115	132	2	11.09	AVVNSSPTDPQTIEDSMN		17.8167	27.0957	29.7927			1.97067	2.99667	3.295						17.4733	27.173	29.4043			1.93233	3.00533	3.25233						19.313	25.8617	29.261			2.136	2.86	3.23633
116	126	1	2.96	VVNSSPTDPQT		39.214	64.7833	68.548			2.16833	3.58233	3.791						38.045	63.6197	70.148			2.10367	3.51833	3.879						42.3787	69.967	81.8087			2.34367	3.869	4.524
116	128	1	5.77	VVNSSPTDPQTIE		29.7983	46.3243	51.0577			2.11867	3.29367	3.63						30.144	46.8487	51.914			2.14333	3.33067	3.691						36.2363	52.9307	60.7347			2.57633	3.76333	4.31833
116	129	2	6.49	VVNSSPTDPQTIED		25.9837	40.6593	43.8673			2.05267	3.21233	3.46567						23.2963	39.4377	45.233			1.84067	3.116	3.57367						24.906	42.3277	43.8365			1.96767	3.34367	3.463
116	132	2	10.89	VVNSSPTDPQTIEDSMN		18.198	27.832	31.0737			1.869	2.85833	3.19133						17.7357	27.5667	30.9277			1.82133	2.83133	3.17633						17.546	27.1563	33.8453			1.802	2.789	3.476
116	133	2	15.46	VVNSSPTDPQTIEDSMNF		16.0747	25.0703	27.4833			1.77767	2.77267	3.03967						15.87	24.7643	26.7637			1.75533	2.739	2.96
133	149	3	9.44	FVDNLKRAGAPVDGASL		34.3303	45.029	59.274			3.797	4.98033	6.556						34.2653	45.928	59.7193			3.78967	5.07933	6.605						38.7363	49.803	63.623			4.284	5.50833	7.03667
133	153	2	10.9	FVDNLKRAGAPVDGASLAGGM		33.097	46.5033	60.7387			4.70633	6.61267	8.637						31.7797	44.6373	59.608			4.51933	6.34767	8.47633						34.459	47.4087	62.9147			4.9	6.74167	8.94633
133	153	3	10.9	FVDNLKRAGAPVDGASLAGGM		32.0295	45.189	60.3983			4.5545	6.426	8.58867						32.3927	44.8217	59.5717			4.606	6.37367	8.471						35.8617	47.1443	61.588			5.09967	6.704	8.75767
133	154	3	13.44	FVDNLKRAGAPVDGASLAGGML		29.364	41.267	53.978			4.40733	6.194	8.102						29.1377	42.248	55.0477			4.37333	6.34133	8.26267						33.058	44.4613	57.9113			4.962	6.674	8.69233
133	156	2	15.85	FVDNLKRAGAPVDGASLAGGMLSI		25.764	38.6403	55.3413			4.27433	6.41067	9.18067						26.4697	39.6413	55.6043			4.391	6.57667	9.225						25.807	39.6617	55.9963			4.28133	6.58	9.28967
134	149	2	7.35	VDNLKRAGAPVDGASL		38.202	50.1567	63.9693			3.92333	5.151	6.56933						38.6937	51.5427	65.9453			3.974	5.29367	6.77267						42.0687	52.632	69.9087			4.32033	5.40533	7.17933
134	154	2	12.28	VDNLKRAGAPVDGASLAGGML		32.6727	46.2293	60.9323			4.646	6.57367	8.66433						32.9623	47.571	61.6247			4.687	6.76467	8.763						30.3587	46.0865	63.633			4.317	6.5535	9.049
138	154	3	11.16	KRAGAPVDGASLAGGML		39.5483	54.096	64.6623			4.374	5.983	7.15167						39.0007	53.881	64.6467			4.31367	5.95933	7.14967						39.7023	52.733	64.7633			4.391	5.83233	7.163
138	156	3	14.36	KRAGAPVDGASLAGGMLSI		29.0627	44.0503	58.2427			3.67333	5.568	7.362						27.773	42.9277	57.6507			3.51067	5.42633	7.287						28.2123	41.5657	54.1453			3.56567	5.25367	6.844
155	174	4	13.8	SIFTKTALDMKTAKRVTAAL		32.1693	37.929	41.954			4.57467	5.39333	5.966						32.9837	39.585	43.993			4.69033	5.62867	6.25567						31.541	39.6727	44.031			4.485	5.64167	6.26133
157	174	2	9.91	FTKTALDMKTAKRVTAAL		20.622	26.5707	30.1653			2.60667	3.35833	3.81267						22.026	26.6043	32.0133			2.78433	3.36267	4.04667						20.2793	24.3663	34.2153			2.563	3.07967	4.32467
158	174	3	8.83	TKTALDMKTAKRVTAAL		20.792	25.527	31.071			2.46367	3.02467	3.682						18.3563	22.5293	28.284			2.17533	2.66967	3.35167						19.2887	23.342	31.834			2.28567	2.766	3.772
163	173	2	0.2	DMKTAKRVTAA		5.264	14.1137	22.5627			0.374	1.00333	1.60433						5.64767	13.912	22.7583			0.401333	0.989	1.61833						7.046	14.5597	22.557			0.501	1.035	1.604
163	174	2	6.87	DMKTAKRVTAAL		2.546	5.922	12.1947			0.201333	0.468	0.963333						2.56633	5.839	12.0803			0.202667	0.461333	0.954667						3.01033	7.95433	18.3107			0.237667	0.628333	1.44667
163	187	4	17.58	DMKTAKRVTAALAIAAETAEGSTAL		10.9763	15.9413	25.1887			1.99433	2.89633	4.57667						11.7803	16.3423	24.461			2.14067	2.96933	4.44433						12.3193	18.045	26.6893			2.23833	3.27867	4.84967
165	174	2	0.98	KTAKRVTAAL		0.248	0.789667	3.81967			0.0153333	0.05	0.241333						0.746	1.04267	4.161			0.047	0.066	0.263						1.03667	3.28	8.839			0.0656667	0.207333	0.558667
174	187	2	11.13	LAIAAETAEGSTAL		17.6817	25.7377	33.154			1.676	2.43967	3.143						14.7407	21.1477	30.6357			1.39767	2.005	2.904						19.9337	29.6033	43.7943			1.88967	2.80667	4.152
175	187	2	8.26	AIAAETAEGSTAL		20.824	27.6763	38.79			1.80967	2.405	3.371						20.4427	27.7923	39.559			1.77633	2.415	3.43767						22.8343	33.3703	48.5			1.984	2.9	4.21467
178	187	1	5.22	AETAEGSTAL		27.1943	36.7533	50.3357			1.71867	2.323	3.18133						26.1663	35.1707	48.7073			1.65367	2.22267	3.07833						29.1477	42.4297	60.3467			1.842	2.68167	3.814
188	196	2	8.71	YNAGGTSVL		52.8283	55.8037	70.3163			2.92133	3.086	3.88833						49.8543	52.6153	66.232			2.757	2.90967	3.66233
188	198	2	10.5	YNAGGTSVLLT		49.4313	53.8313	67.112			3.51467	3.82733	4.772						39.89	44.1863	60.0543			2.836	3.14167	4.27
197	206	1	14.52	LTYCLDQGDL		15.912	26.7757	41.7467			1.00567	1.69233	2.63833						16.1167	26.54	40.302			1.01833	1.67733	2.547						18.933	28.4753	45.6767			1.19633	1.79933	2.887
197	212	2	14.43	LTYCLDQGDLSDAGVE		18.6587	24.4997	37.2307			2.06333	2.70967	4.11767						18.1527	23.7407	35.741			2.00733	2.62567	3.953						21.119	28.942	43.9373			2.336	3.201	4.85967
197	213	2	16	LTYCLDQGDLSDAGVEM		16.8643	23.1493	34.1417			1.99833	2.743	4.04567						16.9083	23.677	33.7567			2.00333	2.80567	4.00033						19.65	27.7167	42.214			2.32867	3.28433	5.00233
199	206	1	12.2	YCLDQGDL		22.215	36.6273	45.0403			1.053	1.736	2.135						22.13	36.1663	45.2393			1.049	1.71433	2.144						24.5503	42.906	51.826			1.16367	2.03367	2.45667
199	212	2	12.04	YCLDQGDLSDAGVE		22.408	27.762	37.7927			2.124	2.632	3.58267						21.0913	27.1197	36.711			1.99967	2.571	3.48						24.7717	33.878	45.8977			2.34833	3.212	4.35133
199	213	2	14.55	YCLDQGDLSDAGVEM		20.452	25.3677	33.829			2.10033	2.60533	3.47433						19.8377	24.506	33.9013			2.037	2.51667	3.48167						26.001	30.5787	44.9063			2.67033	3.14033	4.612
200	212	2	9.56	CLDQGDLSDAGVE		24.1403	30.339	43.5017			2.098	2.63633	3.78033						23.3657	29.746	41.415			2.03033	2.585	3.59933						27.4113	34.1427	51.8017			2.382	2.967	4.50167
200	213	2	12.58	CLDQGDLSDAGVEM		22.72	27.6893	37.3607			2.154	2.625	3.54167						20.896	24.964	35.0007			1.98067	2.36633	3.318						27.356	33.954	48.2753			2.593	3.21867	4.57667
202	212	1	6.39	DQGDLSDAGVE		28.4137	33.8213	43.728			2.02033	2.40467	3.109						28.136	33.9143	45.193			2.00033	2.41133	3.21333						30.8553	37.012	51.7237			2.194	2.63133	3.67767
213	218	1	9.99	MVEGAF		0.873	0.859333	2.47467			0.0276667	0.027	0.078						1.133	0.073	-0.0393333			0.036	0.002	-0.00133333						8.55867	10.6113	15.48			0.270667	0.335333	0.489
213	226	2	14.38	MVEGAFDTVRYMAG		1.23733	8.378	8.921			0.117333	0.794667	0.846						1.00433	6.75267	8.3745			0.0953333	0.64	0.7935						4.80367	11.046	8.519			0.455333	1.047	0.807667
219	226	2	5.67	DTVRYMAG		3.07933	12.7513	15.625			0.146	0.604667	0.740667						3.80167	13.2813	16.6513			0.180333	0.629333	0.789333						5.869	16.7617	23.88			0.278333	0.794333	1.132
227	232	1	3.37	YQCTDA		49.4957	72.0177	87.5597			1.564	2.27567	2.767						49.226	71.9397	89.0027			1.55567	2.27333	2.81267						50.6993	66.708	85.8713			1.602	2.108	2.71367
227	238	2	11.25	YQCTDATTLPQC		32.782	52.9857	70.1473			2.33067	3.76733	4.98767						31.8593	51.4793	68.739			2.265	3.66033	4.887						36.0557	54.9877	72.641			2.56367	3.90967	5.16467
227	240	2	13.12	YQCTDATTLPQCIA		30.7897	42.5077	58.7157			2.676	3.694	5.10233						26.5443	40.0233	55.68			2.307	3.478	4.83867						33.679	49.7073	67.114			2.92633	4.31967	5.832
231	238	1	7.79	DATTLPQC		30.2627	51.64	76.7623			1.19567	2.03967	3.032						32.3893	54.0667	78.4627			1.27933	2.13567	3.099						34.9483	57.3423	80.476			1.38033	2.26533	3.179
239	259	3	6.16	IALMDKYRGRKSASAKGSSAL		12.1083	15.4073	23.8753			1.81733	2.31267	3.58367						11.5917	15.307	23.2307			1.74	2.29733	3.487						12.5843	17.864	31.8337			1.889	2.68133	4.778
241	259	3	3.07	LMDKYRGRKSASAKGSSAL		18.9663	24.9883	33.3367			2.54733	3.356	4.477						18.192	24.6027	33.0723			2.443	3.30433	4.442						22.4613	26.3597	38.016			3.01667	3.54033	5.10567
242	259	2	0.77	MDKYRGRKSASAKGSSAL		21.872	29.303	38.3183			2.76467	3.70367	4.84333						22.4223	30.2107	39.143			2.834	3.81867	4.94767						23.81	32.5183	41.2293			3.01	4.11033	5.21133
242	261	3	1.17	MDKYRGRKSASAKGSSALAA		21.99	24.9823	39.1753			3.12667	3.55267	5.57067						16.613	23.4233	35.3307			2.362	3.331	5.024						20.963	25.3877	42.1467			2.981	3.61	5.99333
243	259	4	0.06	DKYRGRKSASAKGSSAL		27.8513	38.5787	49.4183			3.30067	4.57133	5.856						27.3203	37.6317	48.581			3.23733	4.45933	5.75667
260	268	1	12.64	AAMIGPEQL		56.8187	66.1553	71.4077			2.69333	3.13567	3.38467						56.535	67.6927	75.699			2.68	3.20833	3.588						54.06	67.705	77.7197			2.56233	3.20933	3.68367
260	284	2	18.95	AAMIGPEQLQKCLNTLKTAEAGSAE		62.6013	85.648	94.8635			10.88	14.8857	16.4875						62.9737	86.544	95.338			10.9447	15.0417	16.5695						66.3043	89.1527	99.2263			11.5233	15.4947	17.2457
260	284	3	18.95	AAMIGPEQLQKCLNTLKTAEAGSAE		63.2235	85.93	95.128			10.9885	14.9343	16.533						62.8923	86.774	95.0627			10.931	15.0813	16.522						68.5765	89.0503	99.142			11.9185	15.477	17.2307
260	285	3	18.72	AAMIGPEQLQKCLNTLKTAEAGSAEY		62.0873	84.907	99.1115			11.2813	15.4277	18.0085						61.788	86.5987	96.1927			11.2267	15.735	17.4783						65.5947	89.2063	101.081			11.9187	16.2087	18.366
263	284	3	16.33	IGPEQLQKCLNTLKTAEAGSAE		64.9993	88.8933	95.4373			9.75633	13.343	14.325						64.1993	88.0023	95.8733			9.63633	13.2093	14.3907						66.723	91.7113	99.0553			10.015	13.766	14.868
263	288	3	17.28	IGPEQLQKCLNTLKTAEAGSAEYDEA		51.6013	77.402	87.1103			9.376	14.064	15.828						54.7065	77.178	90.3953			9.94	14.0233	16.425						52.704	77.5217	90.487			9.57633	14.0857	16.4413
263	289	3	18.33	IGPEQLQKCLNTLKTAEAGSAEYDEAL		51.3323	76.9893	93.572			9.73267	14.597	17.741						51.4377	75.6173	89.2733			9.753	14.337	16.9263						51.6577	78.056	92.8307			9.79433	14.7993	17.6007
269	284	3	5.56	QKCLNTLKTAEAGSAE		54.4167	71.4817	81.024			6.01867	7.90567	8.961						55.7477	73.496	82.575			6.16567	8.1285	9.133						58.697	75.4157	85.1523			6.492	8.341	9.418
269	289	3	11.66	QKCLNTLKTAEAGSAEYDEAL		40.4653	53.047	70.8453			6.074	7.96267	10.634						40.0263	54.4783	70.458			6.008	8.177	10.5757						38.8417	56.605	74.1273			5.83	8.49667	11.1267
275	289	2	9.25	LKTAEAGSAEYDEAL		38.5143	49.767	64.194			3.95533	5.111	6.593						39.9733	50.034	66.5317			4.105	5.13833	6.83267						35.5937	47.4783	63.7243			3.65533	4.876	6.54467
276	289	2	8.52	KTAEAGSAEYDEAL		39.4423	43.9557	62.069			3.739	4.16733	5.884						38.1237	44.0853	62.0413			3.61433	4.17933	5.88167						33.4187	42.2883	55.581			3.168	4.009	5.269
289	297	1	14.25	LVTLGSMSY		37.6367	72.3553	89.054			2.081	4.00133	4.92467						40.7427	70.9583	85.78			2.253	3.924	4.744						40.3657	71.795	87.8293			2.232	3.97	4.85667
290	296	1	7.74	VTLGSMS		34.3517	90.3887	98.2923			1.357	3.57067	3.88233						35.9107	82.8463	106.333			1.41833	3.27233	4.2						47.452	94.495	101.334			1.87433	3.73233	4.00267
290	297	1	12.5	VTLGSMSY		37.0263	67.732	84.9433			1.75533	3.21067	4.02633						39.5597	68.3557	85.3177			1.875	3.24	4.044						42.5003	69.2703	87.2597			2.01467	3.28333	4.136
298	304	1	7.84	ISSFTDE		74.2543	72.4013	72.511			2.933	2.85967	2.864						75.69	72.962	73.3173			2.99	2.88167	2.896						67.0157	63.625	69.408			2.64733	2.51333	2.74167
301	314	2	15.8	FTDEIVRAGGVPLL		31.8463	59.8827	72.295			2.76767	5.204	6.28267						35.7657	61.7923	72.927			3.108	5.36967	6.33733						30.874	53.2893	69.1843			2.683	4.63067	6.012
302	314	2	13.72	TDEIVRAGGVPLL		35.1853	63.5517	73.8285			2.77967	5.02067	5.8325						36.3387	63.7997	74.743			2.87067	5.04	5.90467						34.5273	60.102	74.7823			2.728	4.748	5.908
302	316	2	14.93	TDEIVRAGGVPLLIE		27.5393	52.4063	67.577			2.61067	4.96833	6.40633						24.5707	47.7777	58.005			2.32933	4.52933	5.49867						25.5347	51.7857	66.6847			2.42067	4.90933	6.32167
305	314	2	13.37	IVRAGGVPLL		40.6757	64.791	80.364			2.24967	3.58267	4.44433						42.3923	66.4373	81.6667			2.344	3.67367	4.516						41.3893	63.0463	82.2783			2.289	3.48633	4.55
305	316	2	13.51	IVRAGGVPLLIE		30.704	49.2237	60.5827			2.183	3.5	4.30767						31.434	49.951	62.0003			2.235	3.55133	4.40833						31.889	48.449	63.168			2.26733	3.44467	4.49133
315	335	2	15.57	IELINSGLPQMEGNPEKIASM		35.5417	53.064	64.1857			4.77333	7.12667	8.62033						35.556	53.3273	65.36			4.77533	7.162	8.77767						36.9433	53.6123	67.8983			4.96167	7.20033	9.11867
317	335	2	14.2	LINSGLPQMEGNPEKIASM		41.3333	60.9243	78.5343			4.898	7.21967	9.306						38.9807	58.9887	70.6803			4.61933	6.99	8.37567						39.223	59.5323	73.83			4.64833	7.05433	8.749
318	335	2	12.67	INSGLPQMEGNPEKIASM		43.748	65.2913	78.1527			4.83833	7.221	8.64367						44.268	65.698	79.2897			4.896	7.26633	8.76933						44.875	64.778	79.9293			4.963	7.16467	8.84033
336	353	2	14.95	ISGAAKMLARIASNPVNV		16.0693	24.915	33.875			1.90433	2.95267	4.01433						17.0067	26.6273	37			2.01533	3.15533	4.38433						17.3663	25.991	32.381			2.058	3.07967	3.837
336	354	2	14.16	ISGAAKMLARIASNPVNVD		20.7793	28.0703	36.6795			2.62667	3.54833	4.636						21.1133	28.914	37.731			2.66867	3.65467	4.76933						19.5997	27.4627	37.1977			2.47733	3.47133	4.702
336	354	3	14.16	ISGAAKMLARIASNPVNVD		21.2913	27.8633	36.1923			2.691	3.522	4.57467						21.7923	28.6013	38.298			2.75467	3.615	4.84067						20.9563	27.5953	40.4323			2.64867	3.488	5.11033
336	355	2	14.48	ISGAAKMLARIASNPVNVDA		21.031	29.6337	38.237			2.82433	3.97967	5.13533						22.071	29.1023	39.2447			2.964	3.90833	5.27067						21.1133	28.134	39.8753			2.83567	3.77833	5.35533
343	354	2	6.95	LARIASNPVNVD		36.927	47.4967	63.3063			2.62567	3.37667	4.501						37.5367	48.8017	65.916			2.669	3.47	4.68633						37.2153	48.4947	68.1823			2.646	3.448	4.84767
343	355	2	7.62	LARIASNPVNVDA		39.5597	48.7827	63.1657			3.12533	3.854	4.99						39.7007	49.6443	65.2283			3.13633	3.922	5.15333						39.152	49.1143	67.7757			3.093	3.88	5.354
343	365	2	15.92	LARIASNPVNVDAIVQAGGVATL		24.4653	39.884	57.2967			3.86567	6.302	9.053						24.7473	39.8373	60.439			3.91033	6.29433	9.54967						22.2967	39.047	58.2597			3.523	6.16967	9.205
344	354	2	5.15	ARIASNPVNVD		41.4777	54.869	71.676			2.62133	3.468	4.52967						43.335	56.521	74.757			2.739	3.572	4.72433						42.8807	55.5747	73.8713			2.71	3.51233	4.66867
344	355	2	6.58	ARIASNPVNVDA		45.6257	56.5017	71.9387			3.244	4.017	5.11467						46.3563	57.8263	74.3467			3.29567	4.11133	5.28633						44.2237	55.8413	74.2423			3.144	3.97067	5.27867
354	365	2	11.44	DAIVQAGGVATL		12.367	33.1457	53.3337			0.977	2.61867	4.21333						10.883	30.3413	57.2727			0.859667	2.397	4.52433						14.6673	36.0333	54.2205			1.15867	2.84667	4.2835
355	364	1	5.4	AIVQAGGVAT		12.6567	39.6283	75.0547			0.8	2.50467	4.74333						14.3687	42.148	77.6357			0.908333	2.66367	4.90667						12.737	39.4133	77.7497			0.805	2.491	4.91367
355	365	1	10.53	AIVQAGGVATL		11.0243	33.5827	63.5287			0.783667	2.388	4.51667						12.132	36.1383	67.0447			0.862667	2.56933	4.767						12.0737	35.4533	64.9447			0.858333	2.52067	4.61733
355	367	2	11.6	AIVQAGGVATLCT		10.1683	28.8047	51.3263			0.883667	2.50333	4.46033						8.25833	28.233	54.0917			0.717667	2.45367	4.70067						14.3737	31.4455	54.9007			1.249	2.7325	4.771
356	364	1	3.4	IVQAGGVAT		14.2237	44.443	84.2037			0.786667	2.45767	4.65633						15.5463	46.5237	86.3533			0.859667	2.57267	4.77533						16.5447	45.9123	84.5233			0.915	2.539	4.674
356	365	1	9.15	IVQAGGVATL		12.553	38.6533	72.1633			0.793333	2.44267	4.56067						13.8003	40.7197	75.1337			0.872	2.57333	4.74867						14.591	40.4297	71.8593			0.922	2.555	4.54167
366	371	1	5.81	CTAVSY		3.033	11.701	32.6767			0.096	0.369667	1.03233						1.6875	11.529	36.9167			0.0535	0.364333	1.16667						2.06267	12.3177	31.2273			0.065	0.389333	0.987
384	393	2	10.35	MALVPLASRE		18.3507	23.6127	31.806			1.01467	1.30567	1.75867						18.195	25.8267	36.9737			1.006	1.428	2.04467						25.6297	33.9473	47.44			1.41767	1.87733	2.62333
384	395	2	13.29	MALVPLASRESL		9.66633	17.961	28.5327			0.687333	1.277	2.02867						13.284	23.584	35.3357			0.944667	1.677	2.51233						13.516	20.1167	35.814			0.961	1.43033	2.54667
384	398	2	10.84	MALVPLASRESLAHE		14.7953	21.639	32.7847			1.40267	2.05167	3.108						17.5683	26.177	38.0377			1.66533	2.48167	3.60633						15.0423	22.965	36.3267			1.426	2.177	3.44367
384	401	2	13.53	MALVPLASRESLAHEIVQ		11.045	18.648	32.81			1.309	2.21	3.888						12.1987	24.4457	39.4007			1.44567	2.89667	4.669						11.532	18.879	34.9257			1.36667	2.23733	4.13833
384	405	3	17.82	MALVPLASRESLAHEIVQYQTF		18.9713	30.54	42.9967			2.84767	4.584	6.454						22.2093	35.2613	48.8553			3.33367	5.29267	7.333						17.458	31.4047	47.0063			2.62067	4.71367	7.05567
385	395	2	11.02	ALVPLASRESL		22.926	33.098	45.6897			1.44867	2.09167	2.88767						26.1187	36.4107	50.2093			1.65067	2.30133	3.17333						23.9343	35.549	52.5453			1.51233	2.24667	3.321
385	398	3	8.68	ALVPLASRESLAHE		15.861	24.553	37.9703			1.37867	2.13367	3.3						19.6407	29.1657	42.8423			1.70667	2.53467	3.72333						17.7633	25.7337	41.9823			1.54367	2.23633	3.64833
385	401	2	11.95	ALVPLASRESLAHEIVQ		16.7963	22.1627	37.0903			1.85767	2.45133	4.102						13.692	27.5347	43.639			1.51433	3.04533	4.82667						14.6797	23.3517	42.556			1.62333	2.58233	4.70633
385	405	3	16.34	ALVPLASRESLAHEIVQYQTF		21.8947	34.6807	48.0803			3.11333	4.93167	6.837						25.057	39.2363	51.9997			3.563	5.57967	7.39433						20.945	33.673	48.6213			2.97833	4.78833	6.914
385	406	3	16.43	ALVPLASRESLAHEIVQYQTFA		24.817	39.3217	52.8665			3.725	5.90233	7.9355						30.7687	49.653	62.775			4.618	7.453	9.42233						22.0483	37.159	53.9037			3.30933	5.57733	8.091
399	405	1	11.33	IVQYQTF		49.359	74.403	90.8293			1.94967	2.939	3.588						56.9213	81.4687	98.2083			2.24833	3.21833	3.87933						49.86	71.7293	87.857			1.96933	2.833	3.47067
406	412	1	15.91	ATVLPIL		-0.0303333	0.268	2.69			-0.001	0.00866667	0.085						3.59633	5.83633	15.3183			0.113667	0.184667	0.484						2.17367	5.8	16.1253			0.069	0.183333	0.509667
410	423	2	12.97	PILYQNVESPEIAA		23.4233	50.451	84.6975			2.03533	4.38433	7.3605						25.6907	51.858	75.4127			2.23267	4.50667	6.55333						26.4627	54.0607	78.16			2.29933	4.69767	6.792
410	424	2	16.56	PILYQNVESPEIAAL		21.8967	43.6337	64.183			2.07567	4.13633	6.08467						25.7393	48.193	67.9997			2.44033	4.56867	6.44633						22.515	45.5437	68.3673			2.13433	4.31767	6.48133
413	423	1	8.92	YQNVESPEIAA		27.9733	63.9257	81.833			1.768	4.04033	5.172						31.4607	67.1267	84.7687			1.988	4.24233	5.35733						33.87	66.3323	88.449			2.14033	4.19233	5.58967
413	424	2	12.85	YQNVESPEIAAL		29.0885	57.4443	76.3117			2.068	4.08433	5.42567						33.99	61.197	80.8477			2.41667	4.35133	5.74833						35.584	59.1223	79.1443			2.53	4.20367	5.627
427	436	2	2.55	ELVATGSQHE		8.529	8.897	11.6233			0.539	0.562667	0.734333						16.6393	23.1997	29.097			1.05167	1.46633	1.839						12.9157	13.5733	18.9933			0.816	0.857667	1.20033
427	440	2	6.92	ELVATGSQHEEIQE		14.993	16.0967	28.953			1.42133	1.52567	2.74467						19.8073	25.143	35.7463			1.87767	2.38367	3.38867						18.5897	20.5633	32.911			1.76267	1.94967	3.12
427	449	3	9.17	ELVATGSQHEEIQEHMLQNQAAE		11.043	21.9857	37.728			1.832	3.64733	6.25933						15.977	31.211	45.3427			2.65067	5.17767	7.522						13.8997	25.5267	42.5487			2.306	4.23467	7.05867
427	453	3	16.87	ELVATGSQHEEIQEHMLQNQAAEICSL		8.18467	17.8687	33.3003			1.61633	3.529	6.57667						11.52	24.585	38.7897			2.27533	4.85567	7.661						6.6955	17.3653	37.638			1.3225	3.42967	7.434
428	440	2	5.48	LVATGSQHEEIQE		19.3263	20.46	31.015			1.67967	1.778	2.69533						25.907	32.8313	43.6517			2.25133	2.853	3.79333						23.706	26.394	39.8983			2.06	2.29367	3.46733
428	449	3	8.34	LVATGSQHEEIQEHMLQNQAAE		10.9977	22.8717	38.4953			1.73733	3.61367	6.08233						15.752	30.838	45.0577			2.489	4.87233	7.119						13.905	26.6607	43.682			2.19667	4.21233	6.90167
429	440	2	3.26	VATGSQHEEIQE		22.3373	23.9493	35.207			1.76433	1.892	2.781						28.549	34.4543	44.647			2.25533	2.722	3.527						26.0877	27.2657	41.7997			2.061	2.154	3.30233
429	449	2	7.59	VATGSQHEEIQEHMLQNQAAE		11.0073	23.6263	41.119			1.65233	3.54633	6.172						16.3877	31.6987	47.1433			2.46	4.75767	7.07633						11.893	25.482	44.5023			1.785	3.825	6.68
429	449	3	7.59	VATGSQHEEIQEHMLQNQAAE		11.7037	24.038	41.2327			1.75667	3.60833	6.189						16.8197	32.1907	47.5567			2.525	4.83167	7.13833						14.627	27.8787	45.108			2.19567	4.18467	6.771
429	450	3	10.72	VATGSQHEEIQEHMLQNQAAEI		10.2993	22.9507	40.5367			1.62733	3.626	6.40467						14.0433	29.3497	45.6637			2.219	4.637	7.215						12.6553	26.8107	41.6873			1.99967	4.23567	6.58633
429	453	3	16.16	VATGSQHEEIQEHMLQNQAAEICSL		8.03233	19.186	33.5937			1.45933	3.486	6.104						9.85933	23.948	41.0957			1.79133	4.35133	7.467						7.165	16.6033	33.5793			1.30167	3.01667	6.10167
435	449	3	6.91	HEEIQEHMLQNQAAE		8.89833	26.5273	48.9833			0.913667	2.72433	5.03067						15.095	36.9857	56.2957			1.55	3.79833	5.78167						16.591	38.5645	57.3257			1.70367	3.9605	5.88733
441	448	2	1.59	HMLQNQAA		5.04267	40.8947	63.904			0.239	1.93833	3.02933						22.2297	56.8293	74.769			1.05367	2.694	3.544						14.137	49.6603	66.5303			0.67	2.354	3.15333
441	449	1	1.96	HMLQNQAAE		6.68367	36.6537	65.7427			0.369667	2.027	3.63567						17.3533	49.984	73.0103			0.959667	2.76433	4.03733						6.66967	37.6967	69.277			0.369	2.08467	3.831
441	453	2	13.62	HMLQNQAAEICSL		6.231	23.398	36.0757			0.541333	2.033	3.135						10.2723	34.5367	46.5987			0.892667	3.00133	4.04933
454	462	2	2.63	CCQYHTADA		37.5763	42.5073	48.6373			2.078	2.35067	2.69						38.1513	46.791	53.6353			2.10967	2.58767	2.966						37.5757	48.0407	53.3507			2.078	2.65667	2.95033
454	463	2	1.72	CCQYHTADAS		41.451	49.6527	56.031			2.61967	3.138	3.541						46.9597	55.6323	61.1297			2.968	3.516	3.86367						42.0913	49.9913	59.3163			2.66	3.15967	3.749
454	464	2	6.1	CCQYHTADASY		32.7487	40.1753	51.7983			2.32833	2.85667	3.683						36.2513	43.5773	54.371			2.57767	3.09833	3.86567						33.1787	37.521	52.4353			2.359	2.668	3.72833
454	471	3	6.81	CCQYHTADASYQQHAISA		14.6077	16.46	26.293			1.84633	2.08067	3.32333						22.467	29.137	37.2507			2.84	3.68267	4.70833						17.5437	20.2053	34.7897			2.21733	2.554	4.39733
454	472	2	10.27	CCQYHTADASYQQHAISAL		8.462	9.30167	16.9793			1.13633	1.249	2.28033						12.489	15.9737	25.9783			1.67767	2.14533	3.48867						10.1177	11.9793	22.8773			1.359	1.609	3.07233
458	472	2	8.9	HTADASYQQHAISAL		7.62867	8.62333	17.6783			0.783667	0.885667	1.81567						13.432	15.423	30.0367			1.37967	1.584	3.085						10.9073	13.1523	25.809			1.12033	1.351	2.65067
464	472	2	7.99	YQQHAISAL		1.639	2.78	3.59267			0.0906667	0.153667	0.198333						6.15767	11.5863	14.903			0.340333	0.640667	0.824						6.93433	8.10233	17.1377			0.383333	0.448	0.947333
465	472	2	6.2	QQHAISAL		0.302333	-0.025	-0.6215			0.0143333	-0.00133333	-0.0295						9.335	10.5533	11.0105			0.4425	0.5	0.522						3.95833	5.05633	9.28567			0.187667	0.239667	0.440333
473	479	2	7.83	NRLVPRL		2.559	11.761	41.704			0.081	0.371667	1.318						17.8507	32.874	60.3253			0.564	1.03867	1.90633						7.13933	21.0697	48.2473			0.225667	0.666	1.52467
473	482	2	10.6	NRLVPRLTTL		31.1477	48.0193	62.8023			1.72267	2.65567	3.47333						43.2893	57.114	72.703			2.394	3.158	4.02033						30.2507	47.2327	65.2797			1.673	2.612	3.61
473	487	3	9.3	NRLVPRLTTLHGVSE		17.643	35.276	52.8203			1.67267	3.344	5.00733						28.4167	43.2203	57.2603			2.69367	4.09733	5.42867						19.7967	35.2943	54.3997			1.87667	3.34567	5.15733
473	495	3	13.87	NRLVPRLTTLHGVSEYGGIQGVI		10.7657	26.775	40.6567			1.701	4.23033	6.42367						19.1683	36.6097	50.3673			3.02867	5.78433	7.958						11.939	25.202	44.3537			1.88633	3.982	7.008
473	498	3	18.65	NRLVPRLTTLHGVSEYGGIQGVIASL		8.73667	21.912	34.979			1.58733	3.98133	6.3555						11.5587	29.112	45.5957			2.10033	5.28967	8.28467						9.91333	23.773	38.3543			1.801	4.31933	6.969
480	487	2	3.2	TTLHGVSE		18.9633	60.067	86.6853			0.899	2.84733	4.10867						41.6563	70.1443	87.541			1.97467	3.325	4.14933						20.733	53.9663	82.9293			0.982667	2.558	3.93067
480	498	2	18.96	TTLHGVSEYGGIQGVIASL		6.81333	22.885	37.54			0.915	3.07333	5.0415						17.4553	37.4973	53.2343			2.34433	5.036	7.14933						9.44033	25.4533	42.484			1.268	3.41833	5.70567
483	498	2	18.81	HGVSEYGGIQGVIASL		1.60767	16.4107	29.4605			0.177667	1.815	3.258						6.15567	25.4005	47.3013			0.680667	2.8095	5.23133						2.61033	17.8103	33.468			0.288667	1.96967	3.70133
499	509	2	8.12	NANVNNEQVAL		39.4857	50.7387	73.466			2.80733	3.60733	5.22333						49.2073	59.8023	79.899			3.49867	4.252	5.681						37.2627	48.9237	70.9193			2.64933	3.47867	5.04233
499	510	2	12.42	NANVNNEQVALL		33.7143	42.7497	60.6743			2.66367	3.377	4.793						44.1367	53.47	69.2707			3.487	4.22433	5.47233						33.476	42.9413	65.23			2.64467	3.39233	5.15333
510	517	1	12.9	LAVQLLDN		0.434	0.302667	0.253667			0.0206667	0.0143333	0.012						10.761	13.3473	19.276			0.51	0.632667	0.914						1.69567	3.99	7.95933			0.0803333	0.189	0.377667
510	518	2	18.99	LAVQLLDNF		0.35	0.396	0.212			0.019	0.0216667	0.0115						8.23167	8.68733	14.1437			0.455333	0.480667	0.782						3.0505	3.85633	7.614			0.1685	0.213333	0.421
511	518	1	16.81	AVQLLDNF		-0.996333	0.384667	2.96833			-0.047	0.0183333	0.140333						8.718	11.2577	16.773			0.413333	0.533667	0.795						3.70733	2.124	4.30233			0.175667	0.1005	0.204
515	526	2	8.64	LDNFSEVSDAKT		40.8823	43.0197	51.0107			3.22967	3.39867	4.02967						49.2937	53.818	60.1053			3.894	4.25167	4.74833						40.2417	44.9803	53.5453			3.17933	3.55367	4.23
515	535	2	13.58	LDNFSEVSDAKTYMSDGTCVD		42.2403	49.5107	66.6443			6.34	7.43133	10.0033						50.5077	57.3753	72.451			7.581	8.612	10.875						40.7657	47.3987	68.8563			6.11867	7.11467	10.3357
518	526	2	4.07	FSEVSDAKT		54.8307	60.1167	69.8413			3.03233	3.32467	3.86233						68.1573	71.2467	79.9747			3.769	3.94	4.42233						53.276	58.0393	71.5947			2.946	3.20933	3.959
518	535	2	11.58	FSEVSDAKTYMSDGTCVD		49.1193	57.862	77.1993			6.20867	7.31367	9.758						57.7477	65.9953	81.0457			7.299	8.34167	10.244						50.031	56.251	78.3817			6.32367	7.11	9.90767
519	535	2	9.98	SEVSDAKTYMSDGTCVD		59.169	68.4893	91.2077			7.01133	8.116	10.808						67.114	76.9833	94.8233			7.953	9.12267	11.2367						58.2377	69.4273	91.1487			6.90133	8.22733	10.801
527	535	1	6.38	YMSDGTCVD		49.7013	52.505	71.5813			2.74833	2.90367	3.95833						59.688	62.4303	73.794			3.30067	3.45267	4.081						46.6573	46.8887	64.045			2.58	2.593	3.542
539	548	2	3.35	AAMLEHEGND		13.277	19.3747	28.0003			0.839333	1.22467	1.76967						16.272	23.319	28.4647			1.02833	1.47367	1.799						12.811	16.0567	26.81			0.809667	1.015	1.69433
539	550	2	12.36	AAMLEHEGNDLL		15.5917	17.146	23.497			1.23167	1.35467	1.85633						15.426	18.6153	22.305			1.21867	1.47067	1.762						16.1123	16.8567	23.9837			1.273	1.33167	1.89467
542	549	2	3.98	LEHEGNDL		30.7437	36.1257	40.076			1.45733	1.71233	1.89967						32.5637	38.9613	39.9743			1.54367	1.84667	1.89467						29.178	34.5215	39.6857			1.38267	1.636	1.881
542	550	2	8.85	LEHEGNDLL		20.3177	22.131	25.571			1.12333	1.224	1.414						21.253	24.2893	28.183			1.175	1.34333	1.55833						18.9067	19.3267	25.4287			1.04533	1.06867	1.406
549	557	2	10.2	LLISAGVHC		1.22833	1.97	10.33			0.068	0.109	0.571333						2.435	6.095	19.405			0.134667	0.337	1.07333						6.412	6.59367	13.1657			0.354667	0.364667	0.728333
549	558	2	14.97	LLISAGVHCL		0.37	2.12367	11.0547			0.0233333	0.134333	0.698667						0.197333	4.45433	16.406			0.0123333	0.281667	1.037						0.714667	2.19967	13.278			0.0453333	0.139	0.839
550	558	2	10.8	LISAGVHCL		1.22833	1.97	10.33			0.068	0.109	0.571333						2.435	6.095	19.405			0.134667	0.337	1.07333						6.412	6.59367	13.1657			0.354667	0.364667	0.728333
551	558	2	8.06	ISAGVHCL		0.630667	1.617	4.502			0.03	0.0766667	0.213						0.862	3.37933	13.0543			0.041	0.160333	0.619						1.00467	1.83533	6.47567			0.0476667	0.087	0.307
551	576	3	13.68	ISAGVHCLARIATADDCARHLNVLDT		18.547	29.3063	37.5103			3.51633	5.55633	7.11167						45.6577	49.2133	52.903			8.65633	9.331	10.0307						20.6953	30.2787	40.635			3.92367	5.74067	7.70433
552	558	1	8.07	SAGVHCL		0.370333	0.907667	3.07067			0.0146667	0.036	0.121333						1.48667	3.30867	13.468			0.0586667	0.130667	0.531667						4.554	2.77933	10.4893			0.18	0.109667	0.414333
558	576	4	11.26	LARIATADDCARHLNVLDT		27.4223	43.1047	55.8977			3.68267	5.789	7.507						70.1203	73.702	72.764			9.41733	9.898	9.772						31.0747	45.6813	58.2707			4.17333	6.13533	7.82567
559	567	2	2.6	ARIATADDC		29.0623	33.2443	45.0583			1.607	1.83833	2.49167						61.2103	68.685	76.567			3.385	3.79833	4.234						30.523	34.286	49.91			1.68767	1.89633	2.75967
559	574	3	10.14	ARIATADDCARHLNVL		17.9367	37.28	53.472			1.984	4.123	5.914						66.5377	72.3343	73.7093			7.359	8.00033	8.15233						22.4127	42.1027	55.3637			2.47867	4.65667	6.123
559	576	2	10.24	ARIATADDCARHLNVLDT		26.5767	44.9993	58.8553			3.35933	5.688	7.43933						71.2367	75.9737	78.3277			9.00433	9.603	9.901						29.2747	45.8117	60.537			3.70067	5.79067	7.65167
567	576	2	6.45	CARHLNVLDT		29.7793	43.161	57.0833			1.882	2.72767	3.60767						61.6677	60.9483	62.0797			3.89767	3.85167	3.92367						29.4067	41.5093	55.754			1.85833	2.62333	3.52367
568	575	2	5.09	ARHLNVLD		21.41	38.1707	62.8827			1.015	1.80933	2.981						66.141	67.26	65.4783			3.13533	3.18833	3.10367						17.0287	34.7737	60.1707			0.807333	1.64833	2.85167
568	576	2	6.03	ARHLNVLDT		32.126	45.812	62.0297			1.77633	2.53333	3.43033						64.195	68.3367	70.3273			3.55	3.779	3.889						33.963	44.275	60.7113			1.87833	2.44833	3.35733
574	588	2	7.4	LDTAIQTARGNPDGV		61.7647	80.514	90.8167			5.85533	7.633	8.60933						95.3567	89.8363	90.9797			9.04	8.51633	8.625						64.5653	80.562	92.099			6.12067	7.63733	8.731
575	588	2	5.81	DTAIQTARGNPDGV		71.3597	94.3457	102.012			6.20133	8.199	8.865						103.429	100.41	102.982			8.98767	8.72567	8.94933						67.2917	92.1797	102.967			5.84767	8.01033	8.948
576	588	2	4.78	TAIQTARGNPDGV		77.812	100.067	104.8			6.14733	7.90533	8.27933						104.123	102.357	103.08			8.226	8.08633	8.143						78.5837	95.834	104.86			6.208	7.571	8.284
577	589	2	6.04	AIQTARGNPDGVY		70.0093	88.323	95.316			5.53067	6.97767	7.53						97.269	94.1587	94.799			7.68433	7.43867	7.489						67.286	79.8913	89.893			5.31533	6.31167	7.10133
578	588	2	3.21	IQTARGNPDGV		76.5407	94.5947	98.617			4.83767	5.97833	6.23267						100.112	98.903	97.9157			6.32733	6.25067	6.18833						74.779	82.6537	94.086			4.726	5.22367	5.946
581	589	2	3.95	ARGNPDGVY		55.1713	75.7967	85.4113			2.615	3.593	4.04833						87.1147	88.22	86.2187			4.129	4.18167	4.08667						54.0653	67.9627	78.8053			2.56267	3.22167	3.73533
589	598	2	15.74	YRVLAAISGL		1.156	2.03633	9.91033			0.073	0.129	0.626						110.475	109.559	104.676			6.982	6.924	6.61567						7.81167	5.995	18.2487			0.493667	0.378667	1.15333
589	604	3	16.18	YRVLAAISGLSRVPSL		9.30033	10.2247	22.0063			0.955	1.05	2.26						104.143	102.267	102.274			10.6957	10.5027	10.5037						8.73233	14.6703	33.1323			0.896667	1.50667	3.40267
590	598	2	12.06	RVLAAISGL		1.21033	1.20933	2.704			0.067	0.0666667	0.149667						102.049	101.237	101.003			5.64333	5.59833	5.58567						3.80167	7.096	13.674			0.21	0.392333	0.756
593	604	2	12.54	AAISGLSRVPSL		12.9623	13.5037	25.9543			0.921667	0.96	1.84567						90.6523	88.691	87.686			6.44533	6.30567	6.23467						13.5853	17.8913	34.582			0.966	1.27233	2.45867
595	604	2	11.56	ISGLSRVPSL		14.5213	17.006	32.1593			0.803	0.940333	1.77833						87.672	85.1053	86.027			4.84833	4.706	4.75733						15.322	21.721	42.4387			0.847333	1.20133	2.34667
599	604	1	6.66	SRVPSL		35.77	41.495	69.798			0.847667	0.983667	1.65433						115.498	114.29	115.514			2.73733	2.709	2.738						34.8213	45.5027	75.5983			0.825333	1.07833	1.79167
599	606	2	3.45	SRVPSLRQ		42.4013	48.2677	77.993			1.67467	1.90667	3.08067						116.033	110.927	112.017			4.58333	4.38167	4.42433						46.33	53.994	80.229			1.83	2.1325	3.16933
599	608	2	13.47	SRVPSLRQIF		39.0353	51.6157	70.6547			2.15867	2.854	3.907						108.235	104.675	109.722			5.98533	5.78833	6.06733						34.147	55.2623	73.3387			1.88833	3.056	4.05567
