# Supplementary material for: Structural and regulatory insights into the glideosome-associated connector from Toxoplasma gondii
Source: eLife. 2023 Apr 4;12:e86049. doi: 10.7554/eLife.86049 (PMC10125020; doi:10.7554/eLife.86049)
Supplement: Supplementary file 2. — For each state comparison, results are shown for both differences in deuterium uptake by percentage (%D) and by number of deuterons (#D). Largest differences are highlighted in different colours: blue indicates PROTECTION of the peptide, and orange indicates increased EXPOSURE (usually associated with allosteric modifications). [file elife-86049-supp2.xlsx]

## Sheet: HDX differences
	Tables showing the differences in deuterium uptake between two states
	For each state comparison, results are shown for both differences in deuterium uptake by percentage (%D) and by number of deuterons (#D)
	Largest differences are highlighted in different colors: blue indicates PROTECTION of the peptide and red indicates increased EXPOSURE (usually associated with allosteric modifications)
				Cut-off :		20	20	20	20	20				1.5	1.5	1.5	1.5	1.5						20	20	20	20	20				1.5	1.5	1.5	1.5	1.5
						Differences : %D								Differences : #D										Differences : %D								Differences : #D
							GAC N100								GAC N100										GAC N100								GAC N100
						vs	GAC N70							vs	GAC N70									vs	GAC FL							vs	GAC FL
						3s	30s	300s	0	0				3s	30s	300s	0	0						3s	30s	300s	0	0				3s	30s	300s	0	0
Start	End	Charge	Search RT	Sequence		%D	%D	%D	0	0				#D	#D	#D	0	0						%D	%D	%D	0	0				#D	#D	#D	0	0
16	32	3	13.11	TAVQSVIQHQTFKRMLL		0.261	4.26033	10.8117						0.031	0.504667	1.281								-0.659667	2.035	2.30133						-0.078	0.241	0.272667
17	32	3	11.92	AVQSVIQHQTFKRMLL		0.779	0.859667	6.34067						0.0856667	0.095	0.701333								-2.85633	-2.571	2.65033						-0.316667	-0.284667	0.293333
20	27	2	6.99	SVIQHQTF		-1.37067	0.552667	2.67633						-0.0653333	0.026	0.127333								-2.64533	-2.368	1.532						-0.125667	-0.112333	0.0726667
20	32	4	10.58	SVIQHQTFKRMLL		-2.26733	-0.463	0.272333						-0.197	-0.0403333	0.0236667								-4.52033	-4.23567	-1.476						-0.393	-0.368333	-0.128333
33	40	2	11.45	FGLRSLAD		0.204333	0.223667	1.18833						0.01	0.0106667	0.0563333								0.855	3.459	10.989						0.0406667	0.164	0.521
33	41	2	17.03	FGLRSLADF		-3.13533	0.0223333	0.493667						-0.173	0.00133333	0.0273333								-0.77	6.435	14.2353						-0.0426667	0.355667	0.787333
41	48	2	9.66	FCSPSNQL		-1.26433	-2.238	-1.604						-0.0496667	-0.0883333	-0.0633333								0.685667	-3.83633	1.74433						0.027	-0.151667	0.069
42	48	1	4.74	CSPSNQL		2.639	1.51767	1.55367						0.083	0.0476667	0.049								-0.639333	-7.30533	-5.25033						-0.02	-0.231	-0.166
49	64	2	16.94	YQENALDALDRGVLSA		-2.061	1.74267	1.76133						-0.228	0.192667	0.195								-3.81833	4.55433	8.14967						-0.422333	0.503667	0.901
55	62	2	10.06	DALDRGVL		-1.60133	-1.329	-0.044						-0.076	-0.063	-0.002								1.771	2.45667	5.21867						0.0836667	0.116333	0.247333
55	64	1	9.29	DALDRGVLSA		0.377667	0.0573333	-0.0883333						0.0243333	0.00366667	-0.00533333								1.01133	0.451667	2.74667						0.0643333	0.0283333	0.173667
55	64	2	9.29	DALDRGVLSA		-0.226	1.14067	-0.683						-0.0143333	0.072	-0.043								0.896667	-0.201667	2.03333						0.0566667	-0.0126667	0.128333
56	64	2	7.7	ALDRGVLSA		0.290667	2.10267	0.197						0.0156667	0.116	0.011								3.154	2.606	-1.416						0.174	0.144	-0.0786667
63	72	1	13.27	SAIQTAVTTF		1.982	-0.464667	0.498333						0.125333	-0.0296667	0.0313333								0.29	-2.953	4.02933						0.0186667	-0.187	0.254667
63	78	2	17.38	SAIQTAVTTFSDDDDL		-4.408	-2.723	-2.272						-0.487333	-0.301	-0.250667								-3.49533	-2.34533	1.672						-0.386667	-0.259333	0.185333
63	80	2	19.33	SAIQTAVTTFSDDDDLML		-1.93033	-2.02133	-1.05217						-0.244	-0.255667	-0.132833								4.55567	5.24567	2.6665						0.576	0.663	0.337
65	78	2	13.5	IQTAVTTFSDDDDL		-3.71233	-2.91167	-1.75067						-0.352	-0.275667	-0.165667								1.27933	-0.499	4.15833						0.121667	-0.0473333	0.394333
65	80	2	17.98	IQTAVTTFSDDDDLML		-2.63367	-2.318	-3.76367						-0.291	-0.256667	-0.416667								0.755	1.121	0.234667						0.084	0.124	0.0256667
68	77	1	6.88	AVTTFSDDDD		-0.261	-1.07167	-0.952						-0.0166667	-0.0676667	-0.0603333								-1.141	-5.05967	-4.62						-0.0723333	-0.319667	-0.292
68	78	1	11.77	AVTTFSDDDDL		-3.87067	-2.58067	-3.27567						-0.275333	-0.183667	-0.233333								-0.497	-0.71	0.325						-0.035	-0.0506667	0.0226667
68	80	2	17.17	AVTTFSDDDDLML		-2.30067	-1.83433	-3.208						-0.2	-0.159667	-0.278667								5.69433	4.78	4.56967						0.494333	0.415	0.397
72	80	1	16.09	FSDDDDLML		-0.396333	1.33367	1.454						-0.022	0.0736667	0.0803333								2.70033	3.051	9.468						0.149667	0.169	0.523667
73	78	1	4.35	SDDDDL		0.349333	0.422	-0.263333						0.011	0.0133333	-0.008								0.280667	-0.0433333	3.99867						0.009	-0.00133333	0.126667
73	80	1	13.76	SDDDDLML		-1.54533	-0.949333	-1.73267						-0.0726667	-0.0453333	-0.0816667								1.46967	3.65567	4.34167						0.0696667	0.173333	0.205667
81	88	2	11.49	CASRVLWA		-0.237333	-0.145333	0.184667						-0.0113333	-0.00666667	0.00866667								0.703	1.433	5.43167						0.0333333	0.068	0.257333
81	90	2	13.82	CASRVLWAMS		-0.778	0.00733333	0.467						-0.0493333	0.000333333	0.0296667								0.806333	1.73933	5.209						0.0506667	0.109667	0.329333
81	91	2	16.85	CASRVLWAMSV		-0.0256667	-2.70833	-3.31633						0.0456667	-0.192667	-0.235667								4.05233	3.89467	5.19733						0.288333	0.277	0.369667
83	88	1	10.99	SRVLWA		1.45067	-0.671333	0.796333						0.0456667	-0.0213333	0.025								0.468667	-1.154	2.59233						0.0146667	-0.0366667	0.0816667
83	90	2	13.91	SRVLWAMS		-2.205	-4.08233	-1.08133						-0.104333	-0.193333	-0.051								4.58233	3.75933	9.31433						0.217	0.178	0.441667
91	114	3	10.47	VAIKEEMDPAHIARVHSEGSPVIV		1.15933	0.131333	0.587333						0.183667	0.0203333	0.0926667								3.5	1.87567	2.149						0.553	0.296667	0.339333
91	115	3	10.08	VAIKEEMDPAHIARVHSEGSPVIVA		-0.577	0.432333	1.22833						-0.0956667	0.072	0.204								-1.06233	-1.045	-0.247333						-0.176333	-0.173	-0.041
92	114	3	9.9	AIKEEMDPAHIARVHSEGSPVIV		0.118667	-0.703667	-1.275						0.0176667	-0.105667	-0.191333								-0.917	-1.87	5.516						-0.138	-0.280667	0.827667
92	115	3	9.54	AIKEEMDPAHIARVHSEGSPVIVA		0.899333	-0.244	-1.33867						0.142	-0.0383333	-0.211								3.46717	-1.15267	5.82833						0.547667	-0.182333	0.921
93	115	3	9.24	IKEEMDPAHIARVHSEGSPVIVA		1.15933	0.27	1.298						0.174333	0.0403333	0.195								-1.34167	-1.159	5.12333						-0.201	-0.174	0.768667
115	132	2	11.09	AVVNSSPTDPQTIEDSMN		-0.343333	0.0773333	-0.388333						-0.0383333	0.00866667	-0.0426667								1.49633	-1.234	-0.531667						0.165333	-0.136667	-0.0586667
116	126	1	2.96	VVNSSPTDPQT		-1.169	-1.16367	1.6						-0.0646667	-0.064	0.088								3.16467	5.18367	13.2607						0.175333	0.286667	0.733
116	128	1	5.77	VVNSSPTDPQTIE		0.345667	0.524333	0.856333						0.0246667	0.037	0.061								6.438	6.60633	9.677						0.457667	0.469667	0.688333
116	129	2	6.49	VVNSSPTDPQTIED		-2.68733	-1.22167	1.36567						-0.212	-0.0963333	0.108								-1.07767	1.66833	-0.0308333						-0.085	0.131333	-0.00266667
116	132	2	10.89	VVNSSPTDPQTIEDSMN		-0.462333	-0.265333	-0.146						-0.0476667	-0.027	-0.015								-0.652	-0.675667	2.77167						-0.067	-0.0693333	0.284667
116	133	2	15.46	VVNSSPTDPQTIEDSMNF		-0.204667	-0.306	-0.719667						-0.0223333	-0.0336667	-0.0796667
133	149	3	9.44	FVDNLKRAGAPVDGASL		-0.065	0.899	0.445333						-0.00733333	0.099	0.049								4.406	4.774	4.349						0.487	0.528	0.480667
133	153	2	10.9	FVDNLKRAGAPVDGASLAGGM		-1.31733	-1.866	-1.13067						-0.187	-0.265	-0.160667								1.362	0.905333	2.176						0.193667	0.129	0.309333
133	153	3	10.9	FVDNLKRAGAPVDGASLAGGM		0.363167	-0.367333	-0.826667						0.0515	-0.0523333	-0.117667								3.83217	1.95533	1.18967						0.545167	0.278	0.169
133	154	3	13.44	FVDNLKRAGAPVDGASLAGGML		-0.226333	0.981	1.06967						-0.034	0.147333	0.160667								3.694	3.19433	3.93333						0.554667	0.48	0.590333
133	156	2	15.85	FVDNLKRAGAPVDGASLAGGMLSI		0.705667	1.001	0.263						0.116667	0.166	0.0443333								0.043	1.02133	0.655						0.007	0.169333	0.109
134	149	2	7.35	VDNLKRAGAPVDGASL		0.491667	1.386	1.976						0.0506667	0.142667	0.203333								3.86667	2.47533	5.93933						0.397	0.254333	0.61
134	154	2	12.28	VDNLKRAGAPVDGASLAGGML		0.289667	1.34167	0.692333						0.041	0.191	0.0986667								-2.314	-0.142833	2.70067						-0.329	-0.0201667	0.384667
138	154	3	11.16	KRAGAPVDGASLAGGML		-0.547667	-0.215	-0.0156667						-0.0603333	-0.0236667	-0.002								0.154	-1.363	0.101						0.017	-0.150667	0.0113333
138	156	3	14.36	KRAGAPVDGASLAGGMLSI		-1.28967	-1.12267	-0.592						-0.162667	-0.141667	-0.075								-0.850333	-2.48467	-4.09733						-0.107667	-0.314333	-0.518
155	174	4	13.8	SIFTKTALDMKTAKRVTAAL		0.814333	1.656	2.039						0.115667	0.235333	0.289667								-0.628333	1.74367	2.077						-0.0896667	0.248333	0.295333
157	174	2	9.91	FTKTALDMKTAKRVTAAL		1.404	0.0336667	1.848						0.177667	0.00433333	0.234								-0.342667	-2.20433	4.05						-0.0436667	-0.278667	0.512
158	174	3	8.83	TKTALDMKTAKRVTAAL		-2.43567	-2.99767	-2.787						-0.288333	-0.355	-0.330333								-1.50333	-2.185	0.763						-0.178	-0.258667	0.09
163	173	2	0.2	DMKTAKRVTAA		0.383667	-0.201667	0.195667						0.0273333	-0.0143333	0.014								1.782	0.446	-0.00566667						0.127	0.0316667	-0.000333333
163	174	2	6.87	DMKTAKRVTAAL		0.0203333	-0.083	-0.114333						0.00133333	-0.00666667	-0.00866667								0.464333	2.03233	6.116						0.0363333	0.160333	0.483333
163	187	4	17.58	DMKTAKRVTAALAIAAETAEGSTAL		0.804	0.401	-0.727667						0.146333	0.073	-0.132333								1.343	2.10367	1.50067						0.244	0.382333	0.273
165	174	2	0.98	KTAKRVTAAL		0.498	0.253	0.341333						0.0316667	0.016	0.0216667								0.788667	2.49033	5.01933						0.0503333	0.157333	0.317333
174	187	2	11.13	LAIAAETAEGSTAL		-2.941	-4.59	-2.51833						-0.278333	-0.434667	-0.239								2.252	3.86567	10.6403						0.213667	0.367	1.009
175	187	2	8.26	AIAAETAEGSTAL		-0.381333	0.116	0.769						-0.0333333	0.01	0.0666667								2.01033	5.694	9.71						0.174333	0.495	0.843667
178	187	1	5.22	AETAEGSTAL		-1.028	-1.58267	-1.62833						-0.065	-0.100333	-0.103								1.95333	5.67633	10.011						0.123333	0.358667	0.632667
188	196	2	8.71	YNAGGTSVL		-2.974	-3.18833	-4.08433						-0.164333	-0.176333	-0.226
188	198	2	10.5	YNAGGTSVLLT		-9.54133	-9.645	-7.05767						-0.678667	-0.685667	-0.502
197	206	1	14.52	LTYCLDQGDL		0.204667	-0.235667	-1.44467						0.0126667	-0.015	-0.0913333								3.021	1.69967	3.93						0.190667	0.107	0.248667
197	212	2	14.43	LTYCLDQGDLSDAGVE		-0.506	-0.759	-1.48967						-0.056	-0.084	-0.164667								2.46033	4.44233	6.70667						0.272667	0.491333	0.742
197	213	2	16	LTYCLDQGDLSDAGVEM		0.044	0.527667	-0.385						0.005	0.0626667	-0.0453333								2.78567	4.56733	8.07233						0.330333	0.541333	0.956667
199	206	1	12.2	YCLDQGDL		-0.085	-0.461	0.199						-0.004	-0.0216667	0.009								2.33533	6.27867	6.78567						0.110667	0.297667	0.321667
199	212	2	12.04	YCLDQGDLSDAGVE		-1.31667	-0.642333	-1.08167						-0.124333	-0.061	-0.102667								2.36367	6.116	8.105						0.224333	0.58	0.768667
199	213	2	14.55	YCLDQGDLSDAGVEM		-0.614333	-0.861667	0.0723333						-0.0633333	-0.0886667	0.00733333								5.549	5.211	11.0773						0.57	0.535	1.13767
200	212	2	9.56	CLDQGDLSDAGVE		-0.774667	-0.593	-2.08667						-0.0676667	-0.0513333	-0.181								3.271	3.80367	8.3						0.284	0.330667	0.721333
200	213	2	12.58	CLDQGDLSDAGVEM		-1.824	-2.72533	-2.36						-0.173333	-0.258667	-0.223667								4.636	6.26467	10.9147						0.439	0.593667	1.035
202	212	1	6.39	DQGDLSDAGVE		-0.277667	0.093	1.465						-0.02	0.00666667	0.104333								2.44167	3.19067	7.99567						0.173667	0.226667	0.568667
213	218	1	9.99	MVEGAF		0.26	-0.786333	-2.514						0.00833333	-0.025	-0.0793333								7.68567	9.752	13.0053						0.243	0.308333	0.411
213	226	2	14.38	MVEGAFDTVRYMAG		-0.233	-1.62533	-0.5465						-0.022	-0.154667	-0.0525								3.56633	2.668	-0.402						0.338	0.252333	-0.0383333
219	226	2	5.67	DTVRYMAG		0.722333	0.53	1.02633						0.0343333	0.0246667	0.0486667								2.78967	4.01033	8.255						0.132333	0.189667	0.391333
227	232	1	3.37	YQCTDA		-0.269667	-0.078	1.443						-0.00833333	-0.00233333	0.0456667								1.20367	-5.30967	-1.68833						0.038	-0.167667	-0.0533333
227	238	2	11.25	YQCTDATTLPQC		-0.922667	-1.50633	-1.40833						-0.0656667	-0.107	-0.100667								3.27367	2.002	2.49367						0.233	0.142333	0.177
227	240	2	13.12	YQCTDATTLPQCIA		-4.24533	-2.48433	-3.03567						-0.369	-0.216	-0.263667								2.88933	7.19967	8.39833						0.250333	0.625667	0.729667
231	238	1	7.79	DATTLPQC		2.12667	2.42667	1.70033						0.0836667	0.096	0.067								4.68567	5.70233	3.71367						0.184667	0.225667	0.147
239	259	3	6.16	IALMDKYRGRKSASAKGSSAL		-0.516667	-0.100333	-0.644667						-0.0773333	-0.0153333	-0.0966667								0.476	2.45667	7.95833						0.0716667	0.368667	1.19433
241	259	3	3.07	LMDKYRGRKSASAKGSSAL		-0.774333	-0.385667	-0.264333						-0.104333	-0.0516667	-0.035								3.495	1.37133	4.67933						0.469333	0.184333	0.628667
242	259	2	0.77	MDKYRGRKSASAKGSSAL		0.550333	0.907667	0.824667						0.0693333	0.115	0.104333								1.938	3.21533	2.911						0.245333	0.406667	0.368
242	261	3	1.17	MDKYRGRKSASAKGSSALAA		-5.377	-1.559	-3.84467						-0.764667	-0.221667	-0.546667								-1.027	0.405333	2.97133						-0.145667	0.0573333	0.422667
243	259	4	0.06	DKYRGRKSASAKGSSAL		-0.531	-0.947	-0.837333						-0.0633333	-0.112	-0.0993333
260	268	1	12.64	AAMIGPEQL		-0.283667	1.53733	4.29133						-0.0133333	0.0726667	0.203333								-2.75867	1.54967	6.312						-0.131	0.0736667	0.299
260	284	2	18.95	AAMIGPEQLQKCLNTLKTAEAGSAE		0.372333	0.896	0.4745						0.0646667	0.156	0.082								3.703	3.50467	4.36283						0.643333	0.609	0.758167
260	284	3	18.95	AAMIGPEQLQKCLNTLKTAEAGSAE		-0.331167	0.844	-0.0653333						-0.0575	0.147	-0.011								5.353	3.12033	4.014						0.93	0.542667	0.697667
260	285	3	18.72	AAMIGPEQLQKCLNTLKTAEAGSAEY		-0.299333	1.69167	-2.91883						-0.0546667	0.307333	-0.530167								3.50733	4.29933	1.96917						0.637333	0.781	0.3575
263	284	3	16.33	IGPEQLQKCLNTLKTAEAGSAE		-0.8	-0.891	0.436						-0.12	-0.133667	0.0656667								1.72367	2.818	3.618						0.258667	0.423	0.543
263	288	3	17.28	IGPEQLQKCLNTLKTAEAGSAEYDEA		3.10517	-0.224	3.285						0.564	-0.0406667	0.597								1.10267	0.119667	3.37667						0.200333	0.0216667	0.613333
263	289	3	18.33	IGPEQLQKCLNTLKTAEAGSAEYDEAL		0.105333	-1.372	-4.29867						0.0203333	-0.26	-0.814667								0.325333	1.06667	-0.741333						0.0616667	0.202333	-0.140333
269	284	3	5.56	QKCLNTLKTAEAGSAE		1.331	2.01433	1.551						0.147	0.222833	0.172								4.28033	3.934	4.12833						0.473333	0.435333	0.457
269	289	3	11.66	QKCLNTLKTAEAGSAEYDEAL		-0.439	1.43133	-0.387333						-0.066	0.214333	-0.0583333								-1.62367	3.558	3.282						-0.244	0.534	0.492667
275	289	2	9.25	LKTAEAGSAEYDEAL		1.459	0.267	2.33767						0.149667	0.0273333	0.239667								-2.92067	-2.28867	-0.469667						-0.3	-0.235	-0.0483333
276	289	2	8.52	KTAEAGSAEYDEAL		-1.31867	0.129667	-0.0276667						-0.124667	0.012	-0.00233333								-6.02367	-1.66733	-6.488						-0.571	-0.158333	-0.615
289	297	1	14.25	LVTLGSMSY		3.106	-1.397	-3.274						0.172	-0.0773333	-0.180667								2.729	-0.560333	-1.22467						0.151	-0.0313333	-0.068
290	296	1	7.74	VTLGSMS		1.559	-7.54233	8.041						0.0613333	-0.298333	0.317667								13.1003	4.10633	3.042						0.517333	0.161667	0.120333
290	297	1	12.5	VTLGSMSY		2.53333	0.623667	0.374333						0.119667	0.0293333	0.0176667								5.474	1.53833	2.31633						0.259333	0.0726667	0.109667
298	304	1	7.84	ISSFTDE		1.43567	0.560667	0.806333						0.057	0.022	0.032								-7.23867	-8.77633	-3.103						-0.285667	-0.346333	-0.122333
301	314	2	15.8	FTDEIVRAGGVPLL		3.91933	1.90967	0.632						0.340333	0.165667	0.0546667								-0.972333	-6.59333	-3.11067						-0.0846667	-0.573333	-0.270667
302	314	2	13.72	TDEIVRAGGVPLL		1.15333	0.248	0.9145						0.091	0.0193333	0.0721667								-0.658	-3.44967	0.953833						-0.0516667	-0.272667	0.0755
302	316	2	14.93	TDEIVRAGGVPLLIE		-2.96867	-4.62867	-9.572						-0.281333	-0.439	-0.907667								-2.00467	-0.620667	-0.892333						-0.19	-0.059	-0.0846667
305	314	2	13.37	IVRAGGVPLL		1.71667	1.64633	1.30267						0.0943333	0.091	0.0716667								0.713667	-1.74467	1.91433						0.0393333	-0.0963333	0.105667
305	316	2	13.51	IVRAGGVPLLIE		0.73	0.727333	1.41767						0.052	0.0513333	0.100667								1.185	-0.774667	2.58533						0.0843333	-0.0553333	0.183667
315	335	2	15.57	IELINSGLPQMEGNPEKIASM		0.0143333	0.263333	1.17433						0.002	0.0353333	0.157333								1.40167	0.548333	3.71267						0.188333	0.0736667	0.498333
317	335	2	14.2	LINSGLPQMEGNPEKIASM		-2.35267	-1.93567	-7.854						-0.278667	-0.229667	-0.930333								-2.11033	-1.392	-4.70433						-0.249667	-0.165333	-0.557
318	335	2	12.67	INSGLPQMEGNPEKIASM		0.52	0.406667	1.137						0.0576667	0.0453333	0.125667								1.127	-0.513333	1.77667						0.124667	-0.0563333	0.196667
336	353	2	14.95	ISGAAKMLARIASNPVNV		0.937333	1.71233	3.125						0.111	0.202667	0.37								1.297	1.076	-1.494						0.153667	0.127	-0.177333
336	354	2	14.16	ISGAAKMLARIASNPVNVD		0.334	0.843667	1.0515						0.042	0.106333	0.133333								-1.17967	-0.607667	0.518167						-0.149333	-0.077	0.066
336	354	3	14.16	ISGAAKMLARIASNPVNVD		0.501	0.738	2.10567						0.0636667	0.093	0.266								-0.335	-0.268	4.24						-0.0423333	-0.034	0.535667
336	355	2	14.48	ISGAAKMLARIASNPVNVDA		1.04	-0.531333	1.00767						0.139667	-0.0713333	0.135333								0.0823333	-1.49967	1.63833						0.0113333	-0.201333	0.22
343	354	2	6.95	LARIASNPVNVD		0.609667	1.305	2.60967						0.0433333	0.0933333	0.185333								0.288333	0.998	4.876						0.0203333	0.0713333	0.346667
343	355	2	7.62	LARIASNPVNVDA		0.141	0.861667	2.06267						0.011	0.068	0.163333								-0.407667	0.331667	4.61						-0.0323333	0.026	0.364
343	365	2	15.92	LARIASNPVNVDAIVQAGGVATL		0.282	-0.0466667	3.14233						0.0446667	-0.00766667	0.496667								-2.16867	-0.837	0.963						-0.342667	-0.132333	0.152
344	354	2	5.15	ARIASNPVNVD		1.85733	1.652	3.081						0.117667	0.104	0.194667								1.403	0.705667	2.19533						0.0886667	0.0443333	0.139
344	355	2	6.58	ARIASNPVNVDA		0.730667	1.32467	2.408						0.0516667	0.0943333	0.171667								-1.402	-0.660333	2.30367						-0.1	-0.0463333	0.164
354	365	2	11.44	DAIVQAGGVATL		-1.484	-2.80433	3.939						-0.117333	-0.221667	0.311								2.30033	2.88767	0.886833						0.181667	0.228	0.0701667
355	364	1	5.4	AIVQAGGVAT		1.712	2.51967	2.581						0.108333	0.159	0.163333								0.0803333	-0.215	2.695						0.005	-0.0136667	0.170333
355	365	1	10.53	AIVQAGGVATL		1.10767	2.55567	3.516						0.079	0.181333	0.250333								1.04933	1.87067	1.416						0.0746667	0.132667	0.100667
355	367	2	11.6	AIVQAGGVATLCT		-1.91	-0.571667	2.76533						-0.166	-0.0496667	0.240333								4.20533	2.64083	3.57433						0.365333	0.229167	0.310667
356	364	1	3.4	IVQAGGVAT		1.32267	2.08067	2.14967						0.073	0.115	0.119								2.321	1.46933	0.319667						0.128333	0.0813333	0.0176667
356	365	1	9.15	IVQAGGVATL		1.24733	2.06633	2.97033						0.0786667	0.130667	0.188								2.038	1.77633	-0.304						0.128667	0.112333	-0.019
366	371	1	5.81	CTAVSY		-1.3455	-0.172	4.24						-0.0425	-0.00533333	0.134333								-0.970333	0.616667	-1.44933						-0.031	0.0196667	-0.0453333
384	393	2	10.35	MALVPLASRE		-0.155667	2.214	5.16767						-0.00866667	0.122333	0.286								7.279	10.3347	15.634						0.403	0.571667	0.864667
384	395	2	13.29	MALVPLASRESL		3.61767	5.623	6.803						0.257333	0.4	0.483667								3.84967	2.15567	7.28133						0.273667	0.153333	0.518
384	398	2	10.84	MALVPLASRESLAHE		2.773	4.538	5.253						0.262667	0.43	0.498333								0.247	1.326	3.542						0.0233333	0.125333	0.335667
384	401	2	13.53	MALVPLASRESLAHEIVQ		1.15367	5.79767	6.59067						0.136667	0.686667	0.781								0.487	0.231	2.11567						0.0576667	0.0273333	0.250333
384	405	3	17.82	MALVPLASRESLAHEIVQYQTF		3.238	4.72133	5.85867						0.486	0.708667	0.879								-1.51333	0.864667	4.00967						-0.227	0.129667	0.601667
385	395	2	11.02	ALVPLASRESL		3.19267	3.31267	4.51967						0.202	0.209667	0.285667								1.00833	2.451	6.85567						0.0636667	0.155	0.433333
385	398	3	8.68	ALVPLASRESLAHE		3.77967	4.61267	4.872						0.328	0.401	0.423333								1.90233	1.18067	4.012						0.165	0.102667	0.348333
385	401	2	11.95	ALVPLASRESLAHEIVQ		-3.10433	5.372	6.54867						-0.343333	0.594	0.724667								-2.11667	1.189	5.46567						-0.234333	0.131	0.604333
385	405	3	16.34	ALVPLASRESLAHEIVQYQTF		3.16233	4.55567	3.91933						0.449667	0.648	0.557333								-0.949667	-1.00767	0.541						-0.135	-0.143333	0.077
385	406	3	16.43	ALVPLASRESLAHEIVQYQTFA		5.95167	10.3313	9.9085						0.893	1.55067	1.48683								-2.76867	-2.16267	1.03717						-0.415667	-0.325	0.1555
399	405	1	11.33	IVQYQTF		7.56233	7.06567	7.379						0.298667	0.279333	0.291333								0.501	-2.67367	-2.97233						0.0196667	-0.106	-0.117333
406	412	1	15.91	ATVLPIL		3.62667	5.56833	12.6283						0.114667	0.176	0.399								2.204	5.532	13.4353						0.07	0.174667	0.424667
410	423	2	12.97	PILYQNVESPEIAA		2.26733	1.407	-9.28483						0.197333	0.122333	-0.807167								3.03933	3.60967	-6.5375						0.264	0.313333	-0.5685
410	424	2	16.56	PILYQNVESPEIAAL		3.84267	4.55933	3.81667						0.364667	0.432333	0.361667								0.618333	1.91	4.18433						0.0586667	0.181333	0.396667
413	423	1	8.92	YQNVESPEIAA		3.48733	3.201	2.93567						0.22	0.202	0.185333								5.89667	2.40667	6.616						0.372333	0.152	0.417667
413	424	2	12.85	YQNVESPEIAAL		4.9015	3.75267	4.536						0.348667	0.267	0.322667								6.4955	1.678	2.83267						0.462	0.119333	0.201333
427	436	2	2.55	ELVATGSQHE		8.11033	14.3027	17.4737						0.512667	0.903667	1.10467								4.38667	4.67633	7.37						0.277	0.295	0.466
427	440	2	6.92	ELVATGSQHEEIQE		4.81433	9.04633	6.79333						0.456333	0.858	0.644								3.59667	4.46667	3.958						0.341333	0.424	0.375333
427	449	3	9.17	ELVATGSQHEEIQEHMLQNQAAE		4.934	9.22533	7.61467						0.818667	1.53033	1.26267								2.85667	3.541	4.82067						0.474	0.587333	0.799333
427	453	3	16.87	ELVATGSQHEEIQEHMLQNQAAEICSL		3.33533	6.71633	5.48933						0.659	1.32667	1.08433								-1.48917	-0.503333	4.33767						-0.293833	-0.0993333	0.857333
428	440	2	5.48	LVATGSQHEEIQE		6.58067	12.3713	12.6367						0.571667	1.075	1.098								4.37967	5.934	8.88333						0.380333	0.515667	0.772
428	449	3	8.34	LVATGSQHEEIQEHMLQNQAAE		4.75433	7.96633	6.56233						0.751667	1.25867	1.03667								2.90733	3.789	5.18667						0.459333	0.598667	0.819333
429	440	2	3.26	VATGSQHEEIQE		6.21167	10.505	9.44						0.491	0.83	0.746								3.75033	3.31633	6.59267						0.296667	0.262	0.521333
429	449	2	7.59	VATGSQHEEIQEHMLQNQAAE		5.38033	8.07233	6.02433						0.807667	1.21133	0.904333								0.885667	1.85567	3.38333						0.132667	0.278667	0.508
429	449	3	7.59	VATGSQHEEIQEHMLQNQAAE		5.116	8.15267	6.324						0.768333	1.22333	0.949333								2.92333	3.84067	3.87533						0.439	0.576333	0.582
429	450	3	10.72	VATGSQHEEIQEHMLQNQAAEI		3.744	6.399	5.127						0.591667	1.011	0.810333								2.356	3.86	1.15067						0.372333	0.609667	0.181667
429	453	3	16.16	VATGSQHEEIQEHMLQNQAAEICSL		1.827	4.762	7.502						0.332	0.865333	1.363								-0.867333	-2.58267	-0.0143333						-0.157667	-0.469333	-0.00233333
435	449	3	6.91	HEEIQEHMLQNQAAE		6.19667	10.4583	7.31233						0.636333	1.074	0.751								7.69267	12.0372	8.34233						0.79	1.23617	0.856667
441	448	2	1.59	HMLQNQAA		17.187	15.9347	10.865						0.814667	0.755667	0.514667								9.09433	8.76567	2.62633						0.431	0.415667	0.124
441	449	1	1.96	HMLQNQAAE		10.6697	13.3303	7.26767						0.59	0.737333	0.401667								-0.014	1.043	3.53433						-0.000666667	0.0576667	0.195333
441	453	2	13.62	HMLQNQAAEICSL		4.04133	11.1387	10.523						0.351333	0.968333	0.914333
454	462	2	2.63	CCQYHTADA		0.575	4.28367	4.998						0.0316667	0.237	0.276								-0.000666667	5.53333	4.71333						0	0.306	0.260333
454	463	2	1.72	CCQYHTADAS		5.50867	5.97967	5.09867						0.348333	0.378	0.322667								0.640333	0.338667	3.28533						0.0403333	0.0216667	0.208
454	464	2	6.1	CCQYHTADASY		3.50267	3.402	2.57267						0.249333	0.241667	0.182667								0.43	-2.65433	0.637						0.0306667	-0.188667	0.0453333
454	471	3	6.81	CCQYHTADASYQQHAISA		7.85933	12.677	10.9577						0.993667	1.602	1.385								2.936	3.74533	8.49667						0.371	0.473333	1.074
454	472	2	10.27	CCQYHTADASYQQHAISAL		4.027	6.672	8.999						0.541333	0.896333	1.20833								1.65567	2.67767	5.898						0.222667	0.36	0.792
458	472	2	8.9	HTADASYQQHAISAL		5.80333	6.79967	12.3583						0.596	0.698333	1.26933								3.27867	4.529	8.13067						0.336667	0.465333	0.835
464	472	2	7.99	YQQHAISAL		4.51867	8.80633	11.3103						0.249667	0.487	0.625667								5.29533	5.32233	13.545						0.292667	0.294333	0.749
465	472	2	6.2	QQHAISAL		9.03267	10.5783	11.632						0.428167	0.501333	0.5515								3.656	5.08133	9.90717						0.173333	0.241	0.469833
473	479	2	7.83	NRLVPRL		15.2917	21.113	18.6213						0.483	0.667	0.588333								4.58033	9.30867	6.54333						0.144667	0.294333	0.206667
473	482	2	10.6	NRLVPRLTTL		12.1417	9.09467	9.90067						0.671333	0.502333	0.547								-0.897	-0.786667	2.47733						-0.0496667	-0.0436667	0.136667
473	487	3	9.3	NRLVPRLTTLHGVSE		10.7737	7.94433	4.44						1.021	0.753333	0.421333								2.15367	0.0183333	1.57933						0.204	0.00166667	0.15
473	495	3	13.87	NRLVPRLTTLHGVSEYGGIQGVI		8.40267	9.83467	9.71067						1.32767	1.554	1.53433								1.17333	-1.573	3.697						0.185333	-0.248333	0.584333
473	498	3	18.65	NRLVPRLTTLHGVSEYGGIQGVIASL		2.822	7.2	10.6167						0.513	1.30833	1.92917								1.17667	1.861	3.37533						0.213667	0.338	0.6135
480	487	2	3.2	TTLHGVSE		22.693	10.0773	0.855667						1.07567	0.477667	0.0406667								1.76967	-6.10067	-3.756						0.0836667	-0.289333	-0.178
480	498	2	18.96	TTLHGVSEYGGIQGVIASL		10.642	14.6123	15.6943						1.42933	1.96267	2.10783								2.627	2.56833	4.944						0.353	0.345	0.664167
483	498	2	18.81	HGVSEYGGIQGVIASL		4.548	8.98983	17.8408						0.503	0.9945	1.97333								1.00267	1.39967	4.0075						0.111	0.154667	0.443333
499	509	2	8.12	NANVNNEQVAL		9.72167	9.06367	6.433						0.691333	0.644667	0.457667								-2.223	-1.815	-2.54667						-0.158	-0.128667	-0.181
499	510	2	12.42	NANVNNEQVALL		10.4223	10.7203	8.59633						0.823333	0.847333	0.679333								-0.238333	0.191667	4.55567						-0.019	0.0153333	0.360333
510	517	1	12.9	LAVQLLDN		10.327	13.0447	19.0223						0.489333	0.618333	0.902								1.26167	3.68733	7.70567						0.0596667	0.174667	0.365667
510	518	2	18.99	LAVQLLDNF		7.88167	8.29133	13.9317						0.436333	0.459	0.7705								2.7005	3.46033	7.402						0.1495	0.191667	0.4095
511	518	1	16.81	AVQLLDNF		9.71433	10.873	13.8047						0.460333	0.515333	0.654667								4.70367	1.73933	1.334						0.222667	0.0821667	0.0636667
515	526	2	8.64	LDNFSEVSDAKT		8.41133	10.7983	9.09467						0.664333	0.853	0.718667								-0.640667	1.96067	2.53467						-0.0503333	0.155	0.200333
515	535	2	13.58	LDNFSEVSDAKTYMSDGTCVD		8.26733	7.86467	5.80667						1.241	1.18067	0.871667								-1.47467	-2.112	2.212						-0.221333	-0.316667	0.332333
518	526	2	4.07	FSEVSDAKT		13.3267	11.13	10.1333						0.736667	0.615333	0.56								-1.55467	-2.07733	1.75333						-0.0863333	-0.115333	0.0966667
518	535	2	11.58	FSEVSDAKTYMSDGTCVD		8.62833	8.13333	3.84633						1.09033	1.028	0.486								0.911667	-1.611	1.18233						0.115	-0.203667	0.149667
519	535	2	9.98	SEVSDAKTYMSDGTCVD		7.945	8.494	3.61567						0.941667	1.00667	0.428667								-0.931333	0.938	-0.059						-0.11	0.111333	-0.007
527	535	1	6.38	YMSDGTCVD		9.98667	9.92533	2.21267						0.552333	0.549	0.122667								-3.044	-5.61633	-7.53633						-0.168333	-0.310667	-0.416333
539	548	2	3.35	AAMLEHEGND		2.995	3.94433	0.464333						0.189	0.249	0.0293333								-0.466	-3.318	-1.19033						-0.0296667	-0.209667	-0.0753333
539	550	2	12.36	AAMLEHEGNDLL		-0.165667	1.46933	-1.192						-0.013	0.116	-0.0943333								0.520667	-0.289333	0.486667						0.0413333	-0.023	0.0383333
542	549	2	3.98	LEHEGNDL		1.82	2.83567	-0.101667						0.0863333	0.134333	-0.005								-1.56567	-1.60417	-0.390333						-0.0746667	-0.0763333	-0.0186667
542	550	2	8.85	LEHEGNDLL		0.935333	2.15833	2.612						0.0516667	0.119333	0.144333								-1.411	-2.80433	-0.142333						-0.078	-0.155333	-0.008
549	557	2	10.2	LLISAGVHC		1.20667	4.125	9.075						0.0666667	0.228	0.502								5.18367	4.62367	2.83567						0.286667	0.255667	0.157
549	558	2	14.97	LLISAGVHCL		-0.172667	2.33067	5.35133						-0.011	0.147333	0.338333								0.344667	0.076	2.22333						0.022	0.00466667	0.140333
550	558	2	10.8	LISAGVHCL		1.20667	4.125	9.075						0.0666667	0.228	0.502								5.18367	4.62367	2.83567						0.286667	0.255667	0.157
551	558	2	8.06	ISAGVHCL		0.231333	1.76233	8.55233						0.011	0.0836667	0.406								0.374	0.218333	1.97367						0.0176667	0.0103333	0.094
551	576	3	13.68	ISAGVHCLARIATADDCARHLNVLDT		27.1107	19.907	15.3927						5.14	3.77467	2.919								2.14833	0.972333	3.12467						0.407333	0.184333	0.592667
552	558	1	8.07	SAGVHCL		1.11633	2.401	10.3973						0.044	0.0946667	0.410333								4.18367	1.87167	7.41867						0.165333	0.0736667	0.293
558	576	4	11.26	LARIATADDCARHLNVLDT		42.698	30.5973	16.8663						5.73467	4.109	2.265								3.65233	2.57667	2.373						0.490667	0.346333	0.318667
559	567	2	2.6	ARIATADDC		32.148	35.4407	31.5087						1.778	1.96	1.74233								1.46067	1.04167	4.85167						0.0806667	0.058	0.268
559	574	3	10.14	ARIATADDCARHLNVL		48.601	35.0543	20.2373						5.375	3.87733	2.23833								4.476	4.82267	1.89167						0.494667	0.533667	0.209
559	576	2	10.24	ARIATADDCARHLNVLDT		44.66	30.9743	19.4723						5.645	3.915	2.46167								2.698	0.812333	1.68167						0.341333	0.102667	0.212333
567	576	2	6.45	CARHLNVLDT		31.8883	17.7873	4.99633						2.01567	1.124	0.316								-0.372667	-1.65167	-1.32933						-0.0236667	-0.104333	-0.084
568	575	2	5.09	ARHLNVLD		44.731	29.0893	2.59567						2.12033	1.379	0.122667								-4.38133	-3.397	-2.712						-0.207667	-0.161	-0.129333
568	576	2	6.03	ARHLNVLDT		32.069	22.5247	8.29767						1.77367	1.24567	0.458667								1.837	-1.537	-1.31833						0.102	-0.085	-0.073
574	588	2	7.4	LDTAIQTARGNPDGV		33.592	9.32233	0.163						3.18467	0.883333	0.0156667								2.80067	0.048	1.28233						0.265333	0.00433333	0.121667
575	588	2	5.81	DTAIQTARGNPDGV		32.069	6.06467	0.97						2.78633	0.526667	0.0843333								-4.068	-2.166	0.955667						-0.353667	-0.188667	0.083
576	588	2	4.78	TAIQTARGNPDGV		26.3113	2.29	-1.72067						2.07867	0.181	-0.136333								0.771667	-4.23267	0.0593333						0.0606667	-0.334333	0.00466667
577	589	2	6.04	AIQTARGNPDGVY		27.2597	5.83567	-0.517						2.15367	0.461	-0.041								-2.72333	-8.43167	-5.423						-0.215333	-0.666	-0.428667
578	588	2	3.21	IQTARGNPDGV		23.5713	4.30833	-0.701333						1.48967	0.272333	-0.0443333								-1.76167	-11.941	-4.531						-0.111667	-0.754667	-0.286667
581	589	2	3.95	ARGNPDGVY		31.9433	12.4233	0.807333						1.514	0.588667	0.0383333								-1.106	-7.834	-6.606						-0.0523333	-0.371333	-0.313
589	598	2	15.74	YRVLAAISGL		109.319	107.523	94.766						6.909	6.795	5.98967								6.65567	3.95867	8.33833						0.420667	0.249667	0.527333
589	604	3	16.18	YRVLAAISGLSRVPSL		94.8423	92.0423	80.2673						9.74067	9.45267	8.24367								-0.568	4.44567	11.126						-0.0583333	0.456667	1.14267
590	598	2	12.06	RVLAAISGL		100.839	100.028	98.2993						5.57633	5.53167	5.436								2.59133	5.88667	10.97						0.143	0.325667	0.606333
593	604	2	12.54	AAISGLSRVPSL		77.69	75.1873	61.7317						5.52367	5.34567	4.389								0.623	4.38767	8.62767						0.0443333	0.312333	0.613
595	604	2	11.56	ISGLSRVPSL		73.1507	68.0993	53.8677						4.04533	3.76567	2.979								0.800667	4.715	10.2793						0.0443333	0.261	0.568333
599	604	1	6.66	SRVPSL		79.7277	72.795	45.7163						1.88967	1.72533	1.08367								-0.948667	4.00767	5.80033						-0.0223333	0.0946667	0.137333
599	606	2	3.45	SRVPSLRQ		73.6313	62.6597	34.0243						2.90867	2.475	1.34367								3.92867	5.72633	2.236						0.155333	0.225833	0.0886667
599	608	2	13.47	SRVPSLRQIF		69.1997	53.0593	39.067						3.82667	2.93433	2.16033								-4.88833	3.64667	2.684						-0.270333	0.202	0.148667
