# Supplementary material for: Structural and regulatory insights into the glideosome-associated connector from Toxoplasma gondii
Source: eLife. 2023 Apr 4;12:e86049. doi: 10.7554/eLife.86049 (PMC10125020; doi:10.7554/eLife.86049)
Supplement: Supplementary file 3. [file elife-86049-supp3.xlsx]

## Sheet: HDX details
	HDX experimental details
	Dataset :	State 1	State 2	State 3
	Description :	GAC N100	GAC N70	GAC FL
	Reaction volume :	50 ul	50 ul	50 ul
	% D2O in the reaction :	0.75	0.75	0.75
	temperature :	22 °C	22 °C	22 °C
	D2O incubation times (sec) :	3s, 30s, 300s	3s, 30s, 300s	3s, 30s, 300s
	Control sample :	Non-deuterated (ND) GAC N100
	Quench buffer :	4M Gdn-HCl/ 1M NaCl/ 100mM NaH2PO4 pH 2.4/ 1% FA/ 200 mM TCEP
	Quench buffer volume :	20 ul	20 ul	20 ul
	Number of peptides anayzed :	121	121	121
	Sequence coverage :	0.92	0.92	0.92
	Replicates :	3, 3, 3	3, 3, 3	3, 3, 3
	Criteria for HDX rate difference :	Difference of HDX level at a given timepoint is > 20 % and > 1.5 Da and p values of student t-test is < 0.01
	Protein amount (pmol) :	120	120	120
